# Supplementary material for: Cys34 Adductomics Links Colorectal Cancer with the Gut Microbiota and Redox Biology
Source: Oxford University Press journal article supplement (doi:10.1158/0008-5472.can-19-1529), 2019-10-22

**SUPPLEMENTARY INFORMATION FOR:**

**Cys34 Adductomics Provides Evidence Linking Colorectal Cancer with Redox Biology and the Gut Microbiota**

Hasmik Grigoryana, Courtney Schiffmana, Marc. J. Gunterb, Alessio Naccaratic, Silvia Polidoroc, Sonia Dagninoc, Sandrine Dudoita,d, Paolo Vineisc,e and Stephen M. Rappaporta*

a School of Public Health, University of California, Berkeley, California, 94720, United States

bSection of Nutrition and Metabolism, International Agency for Research on Cancer, Lyon, France

c Italian Institute for Genomic Medicine (IIGM), Torino, Italy

d Department of Statistics, University of California, Berkeley, CA, 94720, United States

e MRC-PHE Centre for Environment and Health, Imperial College, Norfolk Place London W2 1PG, UK

**List of supplementary tables and figures:**

**Table S1.** Human serum albumin (T3) peptides detected in 57 CRC cases and 72 controls from the EPIC-Italy cohort.

**Table S2.** Variance components between and within blood specimens from 57 colorectal cancer (CRC) cases and 72 controls. (Based on one-way ANOVA of duplicate injections of sample digests into the LC-HRMS).

**Figure S1.** Tandem mass spectra and selected ion chromatograms of 12 T3 adducts that were unique to the current study.

**Figure S2**. Selected ion chromatograms (SICs) (top) and MS1 spectra (bottom) of 12 T3 adducts that were unique to the current study.

**Figure S3.** Clusters of adducts selected by the partitioning around medoids (PAM) method (k=2, …, 8 ‘pam’ function in R) using Spearman correlations of the normalized abundances.

**Figure S4.** Random forest variable importance plots of adducts predictive of selected covariates.

**Figure S5.** Linear regression of case-control differences in adduct levels on days from recruitment to CRC diagnosis for 47 matched pairs of subjects (associated adducts only).

**Table S1.** Human serum albumin (T3) peptides detected in 57 CRC cases and 72 controls from the EPIC-Italy cohort.

| **Adduct** | **RT, min** | **MIM observed (*m/z*, +3)** | **MIM theoretical (*m/z*, +3)** | **ΔMass (ppm)** | **Added mass (Da)** | **Elemental composition** | **Annotation** | **PAR x1000** | **Fold Change (case/**  **control)** |
| --- | --- | --- | --- | --- | --- | --- | --- | --- | --- |
| 796.43a,b,d | 28.11 | 796.4310 | 796.4301 | 1.07 | -45.988 | -CH2S | Cys34→Gly | 0.45 | 0.98 |
| 805.09 | 28.24 | 805.0853 |  |  | -20.025 |  | Unknown | ND | ND |
| 805.76a,b,d | 27.75 | 805.7627 | 805.7618 | 1.17 | -17.993 | -SH2, +O | Cys34→oxo or fGly | 0.80 | 1.13 |
| 807.43 | 27.61 | 807.4257 | 807.4234 | 2.86 | -13.004 | -CH | Unknown | ND | ND |
| 808.73a,b,c,d | 28.25 | 808.7298 |  |  | -9.091 |  | Not Cys34 adduct | 0.10 | 0.92 |
| 810.45a,c | 28.72 | 810.4542 |  |  | -3.918 |  | Not Cys34 adduct | 1.32 | 1.07 |
| 811.43a,b,c,d | 30.80 | 811.4246f | 811.4234 | 1.49 | -1.007 |  | T3 dimere | 5.96 | 1.08 |
| 811.76_01a,b,c,d | 28.53 | 811.7603 |  |  | 0.000 |  | T3 labile adduct | 1.76 | 1.11 |
| 811.76_02a,b,c,d | 28.78 | 811.7604 | 811.7594 | 1.25 | 0.000 |  | Unmodified T3e | 33.7 | 1.03 |
| 815.44 | 29.03 | 815.4413 |  |  | 12.051 |  | Unknown | 0.60 | 1.04 |
| 816.42a,b,c,d | 27.58 | 816.4199 | 816.4191 | 0.99 | 14.987 | -H2, +O | Cys34-Glne | 2.93 | 1.01 |
| 816.43a,b,c,d | 29.02 | 816.4318 | 816.4312 | 0.64 | 15.022 | +CH3 | Methylation (not Cys34) | 1.42 | 0.99 |
| 822.42a,b,c,d | 27.69 | 822.4235 | 822.4226 | 1.10 | 32.998 | +HO2 | Cys34 sulfinic acide | 4.39 | 1.02 |
| 826.43a | 27.88 | 826.4352 | 826.4348 | 0.51 | 45.033 | +C2H5O | Ethylene oxide | 0.18 | 0.89 |
| 826.76 | 28.11 | 826.7639 |  |  | 46.019 |  | Unknown | ND | ND |
| 827.09b,d | 29.62 | 827.0891 | 827.0886 | 0.66 | 46.994 | +CH3S | S-Methanethiole | 0.12 | 1.20 |
| 827.10c,d | 28.11 | 827.0950 | 827.0945 | 0.54 | 47.012 | +CH3O2 | S-(O)-O-CH3 | 0.33 | 0.97 |
| 827.76a,b,c,d | 27.93 | 827.7547 | 827.7543 | 0.52 | 48.991 | +HO3 | Cys34 Sulfonic acide | 0.34 | 1.11 |
| 829.43a | 28.97 | 829.4353 | 829.4349 | 0.56 | 54.033 | +C3H4N | Acrylonitrile | 0.21 | 0.86 |
| 835.11a,d | 28.99 | 835.1074 | 835.1066 | 0.90 | 71.049 | +C4H7O | Crotonaldehydee | 0.32 | 1.13 |
| 835.44 | 27.57 | 835.4389 | 835.4384 | 0.58 | 72.044 | +C3H6NO | Acrylamide | ND | ND |
| 841.75a,b,c,d | 28.54 | 841.7524 | 841.7519 | 0.59 | 90.984 | +C2H3O2S | S-Mercaptoacetic acid | 0.73 | 1.04 |
| 845.11 | 28.06 | 845.1110 | 845.1102 | 1.01 | 101.060 | +C5H9O2 | Glutaraldehyde | ND | ND |
| 845.42a,b,c,d | 27.54 | 845.4251 | 845.4239 | 1.49 | 102.002 | +C3H4NOS | S-Cys (−H2O) | 0.98 | 0.99 |
| 846.42 | 28.94 | 846.4244 | 846.4238 | 0.80 | 105.000 | +C3H5O2S | S-Thiolactic acid | ND | ND |
| 847.11a,b,c | 29.62 | 847.1075 | 847.1066 | 0.96 | 107.049 | +C7H7O | Benzaldehyde or quinone methide | 0.47 | 0.79 |
| 847.72 | 27.52 | 847.7219 |  |  | 108.893 |  | Unknown | 0.09 | 0.87 |
| 847.77a,b | 27.56 | 847.7678 |  |  | 109.030 |  | Unknown | 0.10 | 1.00 |
| 850.10a,b,d | 28.62 | 850.0963 | 850.0958 | 0.59 | 116.016 | +C4H6NOS | S-hCys (-H2O) | 0.13 | 0.82 |
| 851.06 | 28.15 | 851.0613 |  |  | 118.911 |  | Unknown | 0.18 | 1.11 |
| 851.43a,b,c,d | 26.62 | 851.4286 | 851.4274 | 1.48 | 120.013 | +C3H6NO2S | S-Cyse | 202 | 1.08 |
| 851.76a,b,c,d | 27.92 | 851.7560 | 851.7554 | 0.71 | 120.995 | +C3H5O3S | S-Cys(NH2→OH) | 1.81 | 0.99 |
| 853.78a,b | 27.87 | 853.7834 |  |  | 127.077 |  | unknown | 2.33 | 1.18 |
| 856.10_1a,b,c,d | 27.18 | 856.0997 | 856.0993 | 0.54 | 134.026 | +C4H8NO2S | S-hCyse | 12.0 | 0.96 |
| 856.10_2a,b,c,d | 26.89 | 856.1003 | 856.0993 | 1.25 | 134.028 | +C4H8NO2S | S-hCyse | 13.5 | 0.91 |
| 856.43d | 28.18 | 856.4280 | 856.4273 | 0.85 | 135.011 | +C4H7O3S | S-hCys (NH2→OH) | 0.16 | 0.99 |
| 857.10a,b,d | 27.87 | 857.0992 | 857.0992 | 0.10 | 137.025 | +C4H9O3S | Unknown | 0.26 | 1.11 |
| 858.76a,b,c,d | 26.48 | 858.7605 | 858.7597 | 0.93 | 142.009 | +C6H6O2S | Unknown | ND | ND |
| 859.41d | 26.68 | 859.4103 |  |  | 143.958 |  | Unknown | 1.22 | 0.84 |
| 860.77b,c | 27.30 | 860.7717 | 860.7712 | 0.65 | 148.042 | +C5H10NO2S | S-hCys (+CH3) | 0.73 | 0.83 |
| 864.08a,b,d | 26.69 | 864.0762 |  |  | 157.956 |  | Unknown | 5.66 | 0.75 |
| 865.43a,b,c | 27.81 | 865.4325 | 865.4309 | 1.83 | 162.025 | +C5H8NO3S | S-(N-acetyl)Cys | | ND | ND | | --- | --- | | | ND | ND | | --- | --- | |
| 870.44a,b,c,d | 26.40 | 870.4355 | 870.4345 | 1.05 | 177.033 | +C5H9N2O3S | S-CysGlye | 24.8 | 1.02 |
| 871.73 | 26.69 | 871.7319 |  |  | 180.923 |  | Unknown | 0.58 | 1.12 |
| 875.11b,c | 26.67 | 875.1065 | 875.1064 | 0.09 | 191.047 | +C6H11N2O3S | S-CysGly (+CH3) | 2.07 | 0.98 |
| 876.15 | 26.50 | 876.1488 |  |  | 194.173 |  | Unknown | ND | ND |
| 879.13 | 34.57 | 879.1273 |  |  | 203.109 |  | Unknown | 0.16 | 1.00 |
| 883.08b,d | 26.32 | 883.0836 |  |  | 214.978 |  | Unknown | 0.70 | 1.04 |
| 894.13b,c | 25.03 | 894.1271 |  |  | 248.108 |  | Unknown | 0.22 | 1.06 |
| 894.44a,b,c,d | 26.95 | 894.4417 | 894.4416 | 0.15 | 249.052 | +C8H13N2O5S | S-γ-GluCyse | 1.54 | 1.00 |
| 913.45a,b,c,d | 26.61 | 913.4492 | 913.4487 | 0.52 | 306.075 | +C10H16N3O6S | S-Glutathionee | 1.38 | 1.00 |
| 931.82b,c,d | 25.71 | 931.8216 |  |  | 361.192 |  | Unknown | 0.55 | 0.93 |
| 965.49b,c,d | 25.64 | 965.4917 |  |  | 462.202 |  | Unknown | 9.81 | 1.00 |
| 970.16c | 26.00 | 970.1633 |  |  | 476.217 |  | Unknown | 0.50 | 1.05 |
| 981.50b | 25.43 | 981.4955 |  |  | 510.214 |  | Unknown | 0.14 | 0.88 |

Legend: Mass, difference in observed and theoretical masses of the adducted peptide; fGly, formylglycine; oxo, oxoalanine; MIM, monoisotopic mass; ND, not determined; PAR, ratio of adduct peak abundance to housekeeping peptide (HKP) peak abundance; RT, retention time.

a Also reported in (11).

b Also reported in (36).

c Also reported in (35).

d Also reported in (22).

e Annotation confirmed with a synthetic standard.

f+6 charge state.

**Table S2.** Variance components between and within blood specimens from 57 colorectal cancer (CRC) cases and 72 controls. (Based on one-way ANOVA of duplicate injections of sample digests into the LC-HRMS).

| Adduct  (*m/z*, +3) | Variance  between specimens | Variance  within specimens | ICC | CV |
| --- | --- | --- | --- | --- |
| 575.3111 | 0.084 | 0.018 | 0.826 | 0.134 |
| 796.4310 | 0.135 | 0.043 | 0.758 | 0.210 |
| 805.7627 | 0.066 | 0.045 | 0.597 | 0.213 |
| 808.7298 | 0.169 | 0.174 | 0.492 | 0.436 |
| 810.4542 | 0.162 | 0.049 | 0.767 | 0.225 |
| 811.4246 | 0.314 | 0.131 | 0.705 | 0.375 |
| 811.7603 | 0.128 | 0.035 | 0.785 | 0.189 |
| 811.7604 | 0.245 | 0.024 | 0.912 | 0.154 |
| 815.4413 | 0.173 | 0.097 | 0.639 | 0.320 |
| 816.4199 | 0.124 | 0.048 | 0.721 | 0.222 |
| 816.4318 | 0.321 | 0.060 | 0.843 | 0.248 |
| 822.4235 | 0.087 | 0.039 | 0.691 | 0.199 |
| 826.4352 | 1.186 | 0.336 | 0.779 | 0.631 |
| 827.0891 | 0.110 | 0.147 | 0.428 | 0.398 |
| 827.0950 | 0.218 | 0.048 | 0.820 | 0.221 |
| 827.7547 | 0.081 | 0.046 | 0.637 | 0.216 |
| 829.4353 | 2.034 | 0.037 | 0.982 | 0.193 |
| 834.7759 | 0.062 | 0.029 | 0.683 | 0.171 |
| 835.1074 | 0.059 | 0.061 | 0.494 | 0.250 |
| 841.7524 | 0.291 | 0.050 | 0.852 | 0.227 |
| 845.4251 | 0.174 | 0.051 | 0.775 | 0.228 |
| 847.1075 | 1.314 | 0.114 | 0.920 | 0.347 |
| 847.7219 | 0.863 | 0.394 | 0.687 | 0.695 |
| 847.7678 | 0.105 | 0.198 | 0.345 | 0.468 |
| 850.0963 | 0.755 | 0.204 | 0.787 | 0.476 |
| 851.0613 | 1.072 | 0.238 | 0.819 | 0.518 |
| 851.4286 | 0.151 | 0.022 | 0.873 | 0.149 |
| 851.7560 | 0.164 | 0.031 | 0.840 | 0.178 |
| 853.7834 | 0.086 | 0.027 | 0.760 | 0.166 |
| 856.1003 | 0.258 | 0.059 | 0.815 | 0.245 |
| 856.0997 | 0.210 | 0.043 | 0.830 | 0.209 |
| 856.4300 | 0.201 | 0.174 | 0.536 | 0.436 |
| 857.0992 | 0.559 | 0.132 | 0.809 | 0.376 |
| 859.4103 | 0.858 | 0.176 | 0.830 | 0.438 |
| 860.7717 | 0.419 | 0.106 | 0.798 | 0.334 |
| 864.0762 | 4.298 | 0.454 | 0.904 | 0.758 |
| 870.4355 | 0.177 | 0.039 | 0.820 | 0.199 |
| 871.7319 | 0.894 | 0.337 | 0.726 | 0.633 |
| 875.1065 | 0.464 | 0.055 | 0.894 | 0.238 |
| 879.1273 | 2.588 | 0.185 | 0.933 | 0.451 |
| 883.0836 | 1.577 | 0.319 | 0.832 | 0.613 |
| 894.1271 | 0.261 | 0.247 | 0.514 | 0.529 |
| 894.4417 | 0.119 | 0.160 | 0.427 | 0.417 |
| 913.4492 | 0.224 | 0.049 | 0.820 | 0.225 |
| 931.8216 | 0.402 | 0.130 | 0.756 | 0.373 |
| 965.4917 | 0.206 | 0.095 | 0.686 | 0.315 |
| 970.1633 | 0.265 | 0.142 | 0.651 | 0.391 |
| 981.4955 | 0.407 | 0.175 | 0.699 | 0.438 |
|  |  | Median= | 0.777 | 0.283 |
|  |  | Min= | 0.345 | 0.134 |
|  |  | Max= | 0.982 | 0.758 |

Legend: ICC, intraclass correlation coefficient; CV, coefficient of variation.

**Supplemental Figures**

**Figure S1.** Tandem mass spectra of 12 T3 adducts that were unique to the current study. Each spectrum represents the actual signal intensities for the corresponding fragment ions and are highlighted differently to pinpoint the b- (blue) and the y- (red) series ions. The headline in each figure indicates the raw file name (ORBXXXXX_XXX), sample ID (_XX), MS1 (Precursor) scan #(_XXXX), MIM (_MZ_XXX.XXXX), retention time in min. (_RT_XX.XX), MS2 scan # (_MS.MS.Scan_XXXX). The adduct ID is shown on the right upper corner of each spectrum (See Table 1 in the main manuscript for adduct annotations).


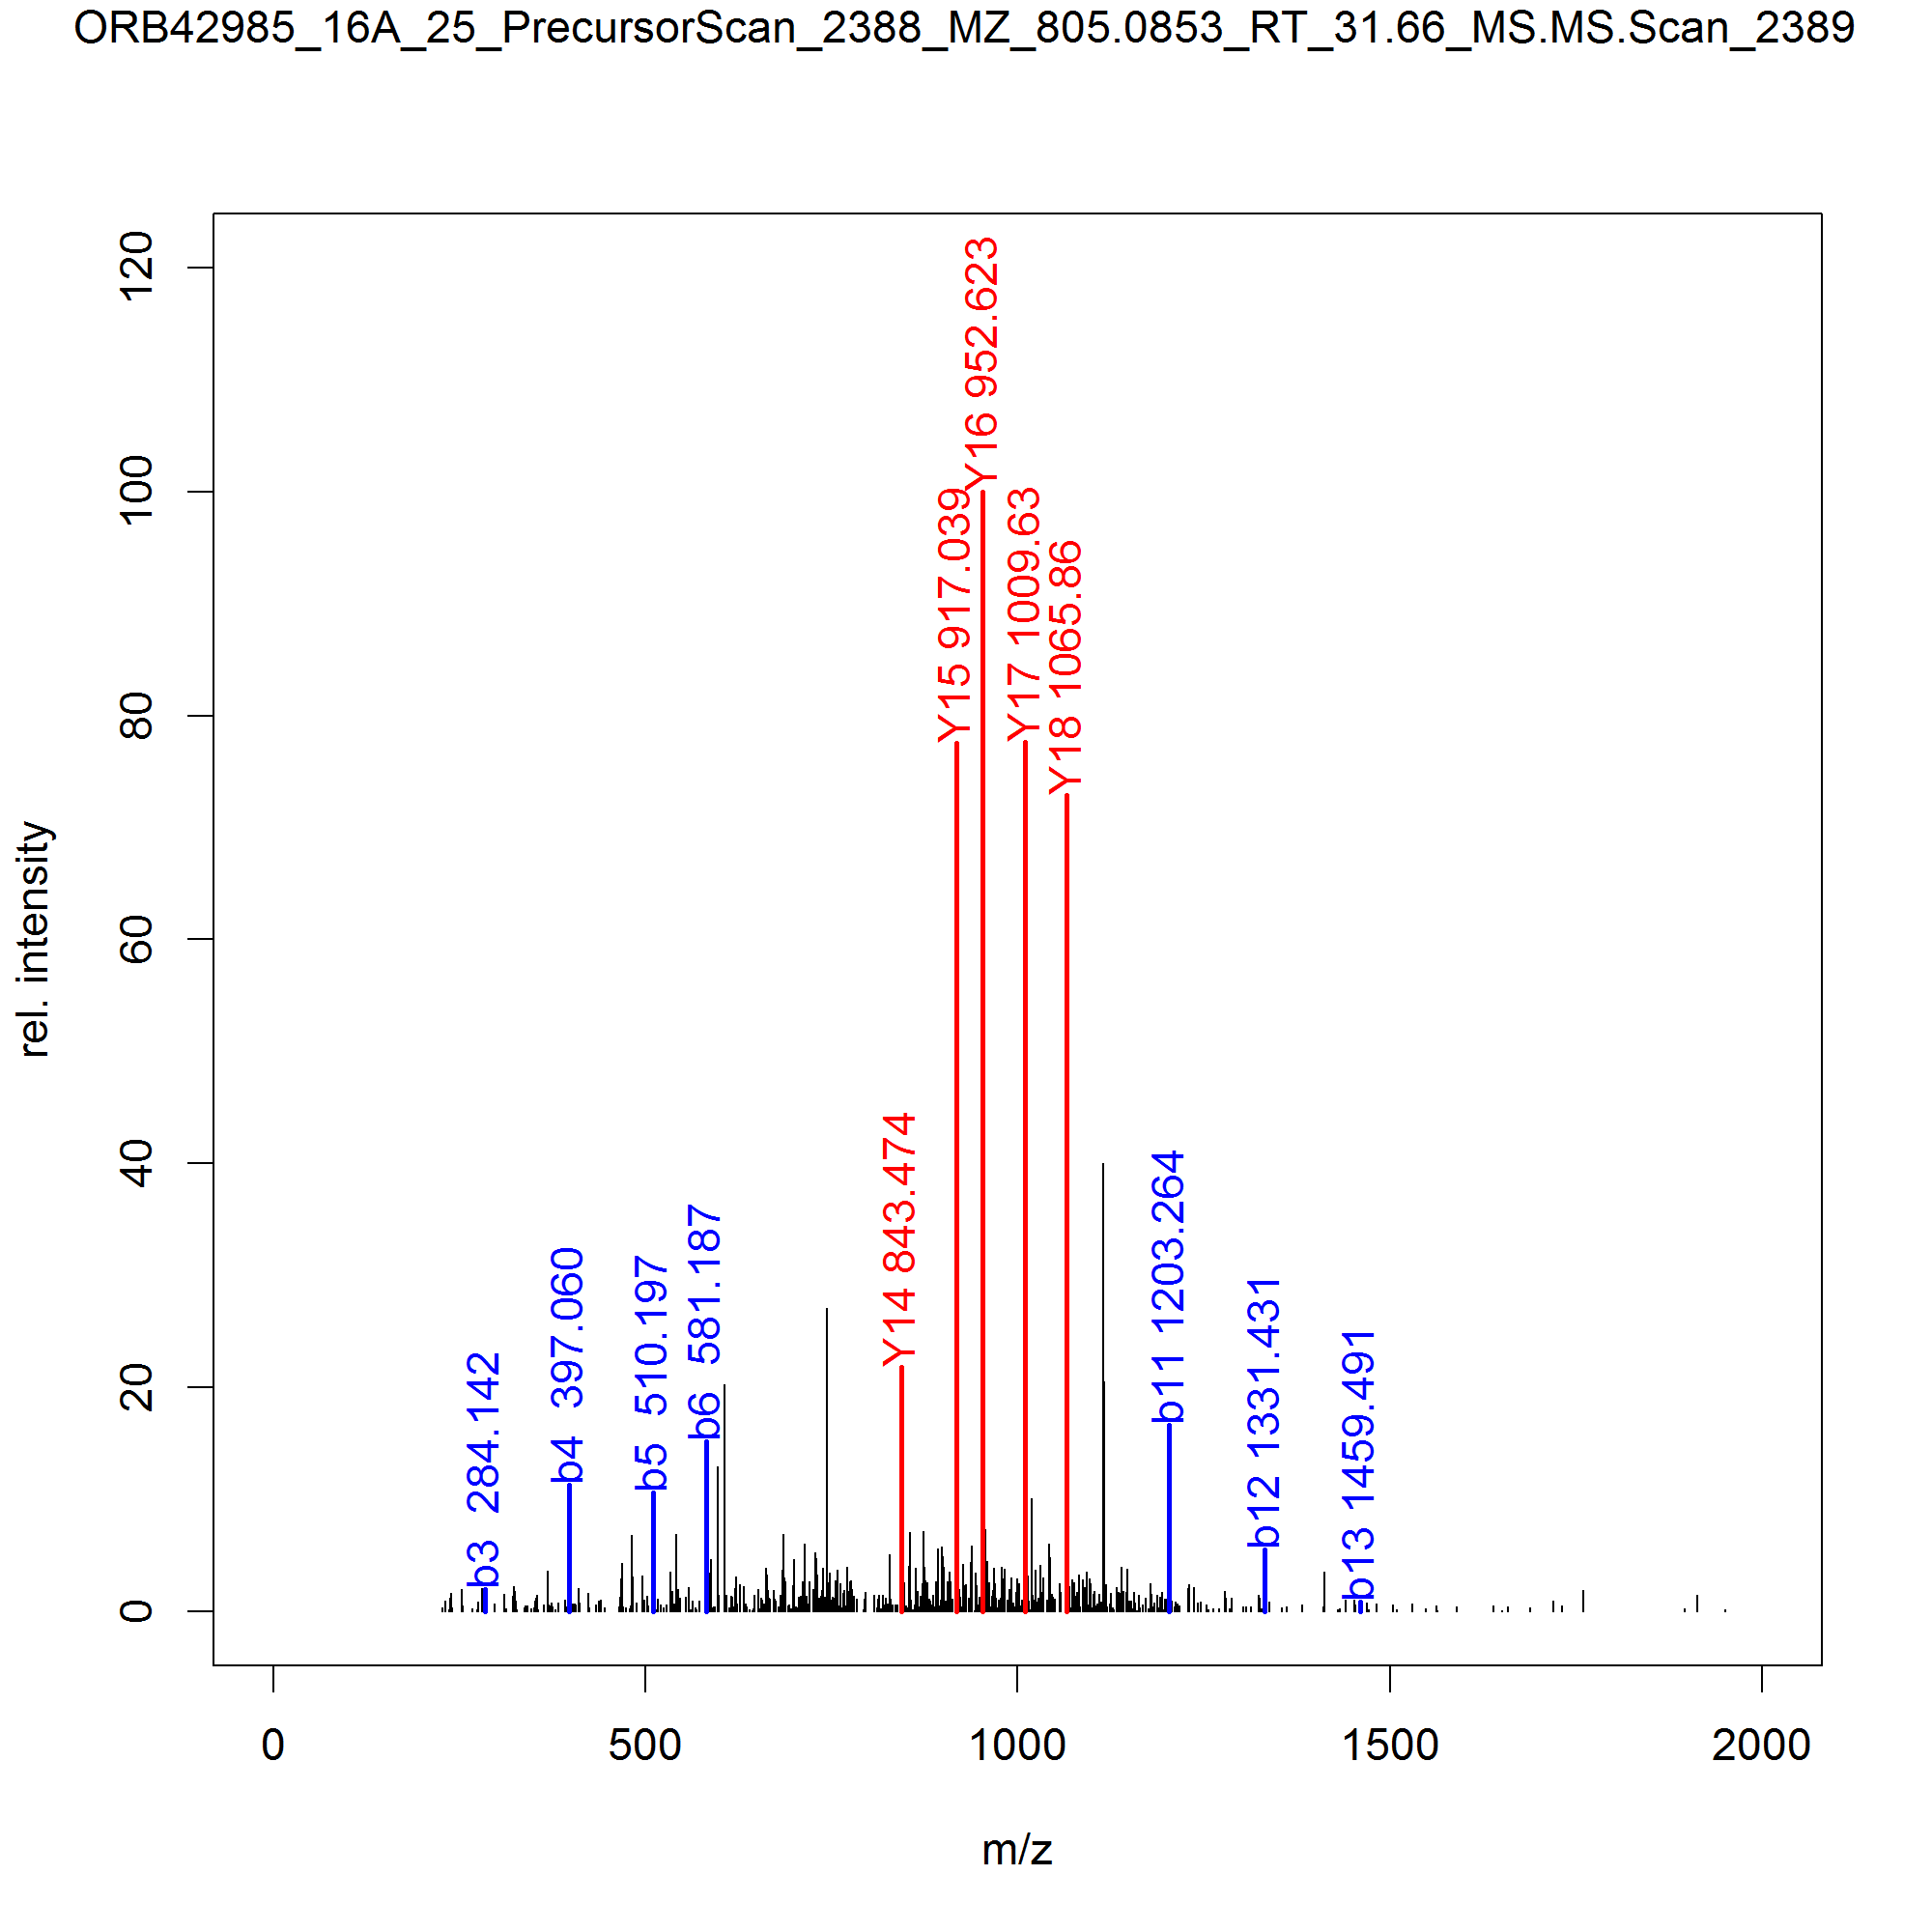


**805.09**


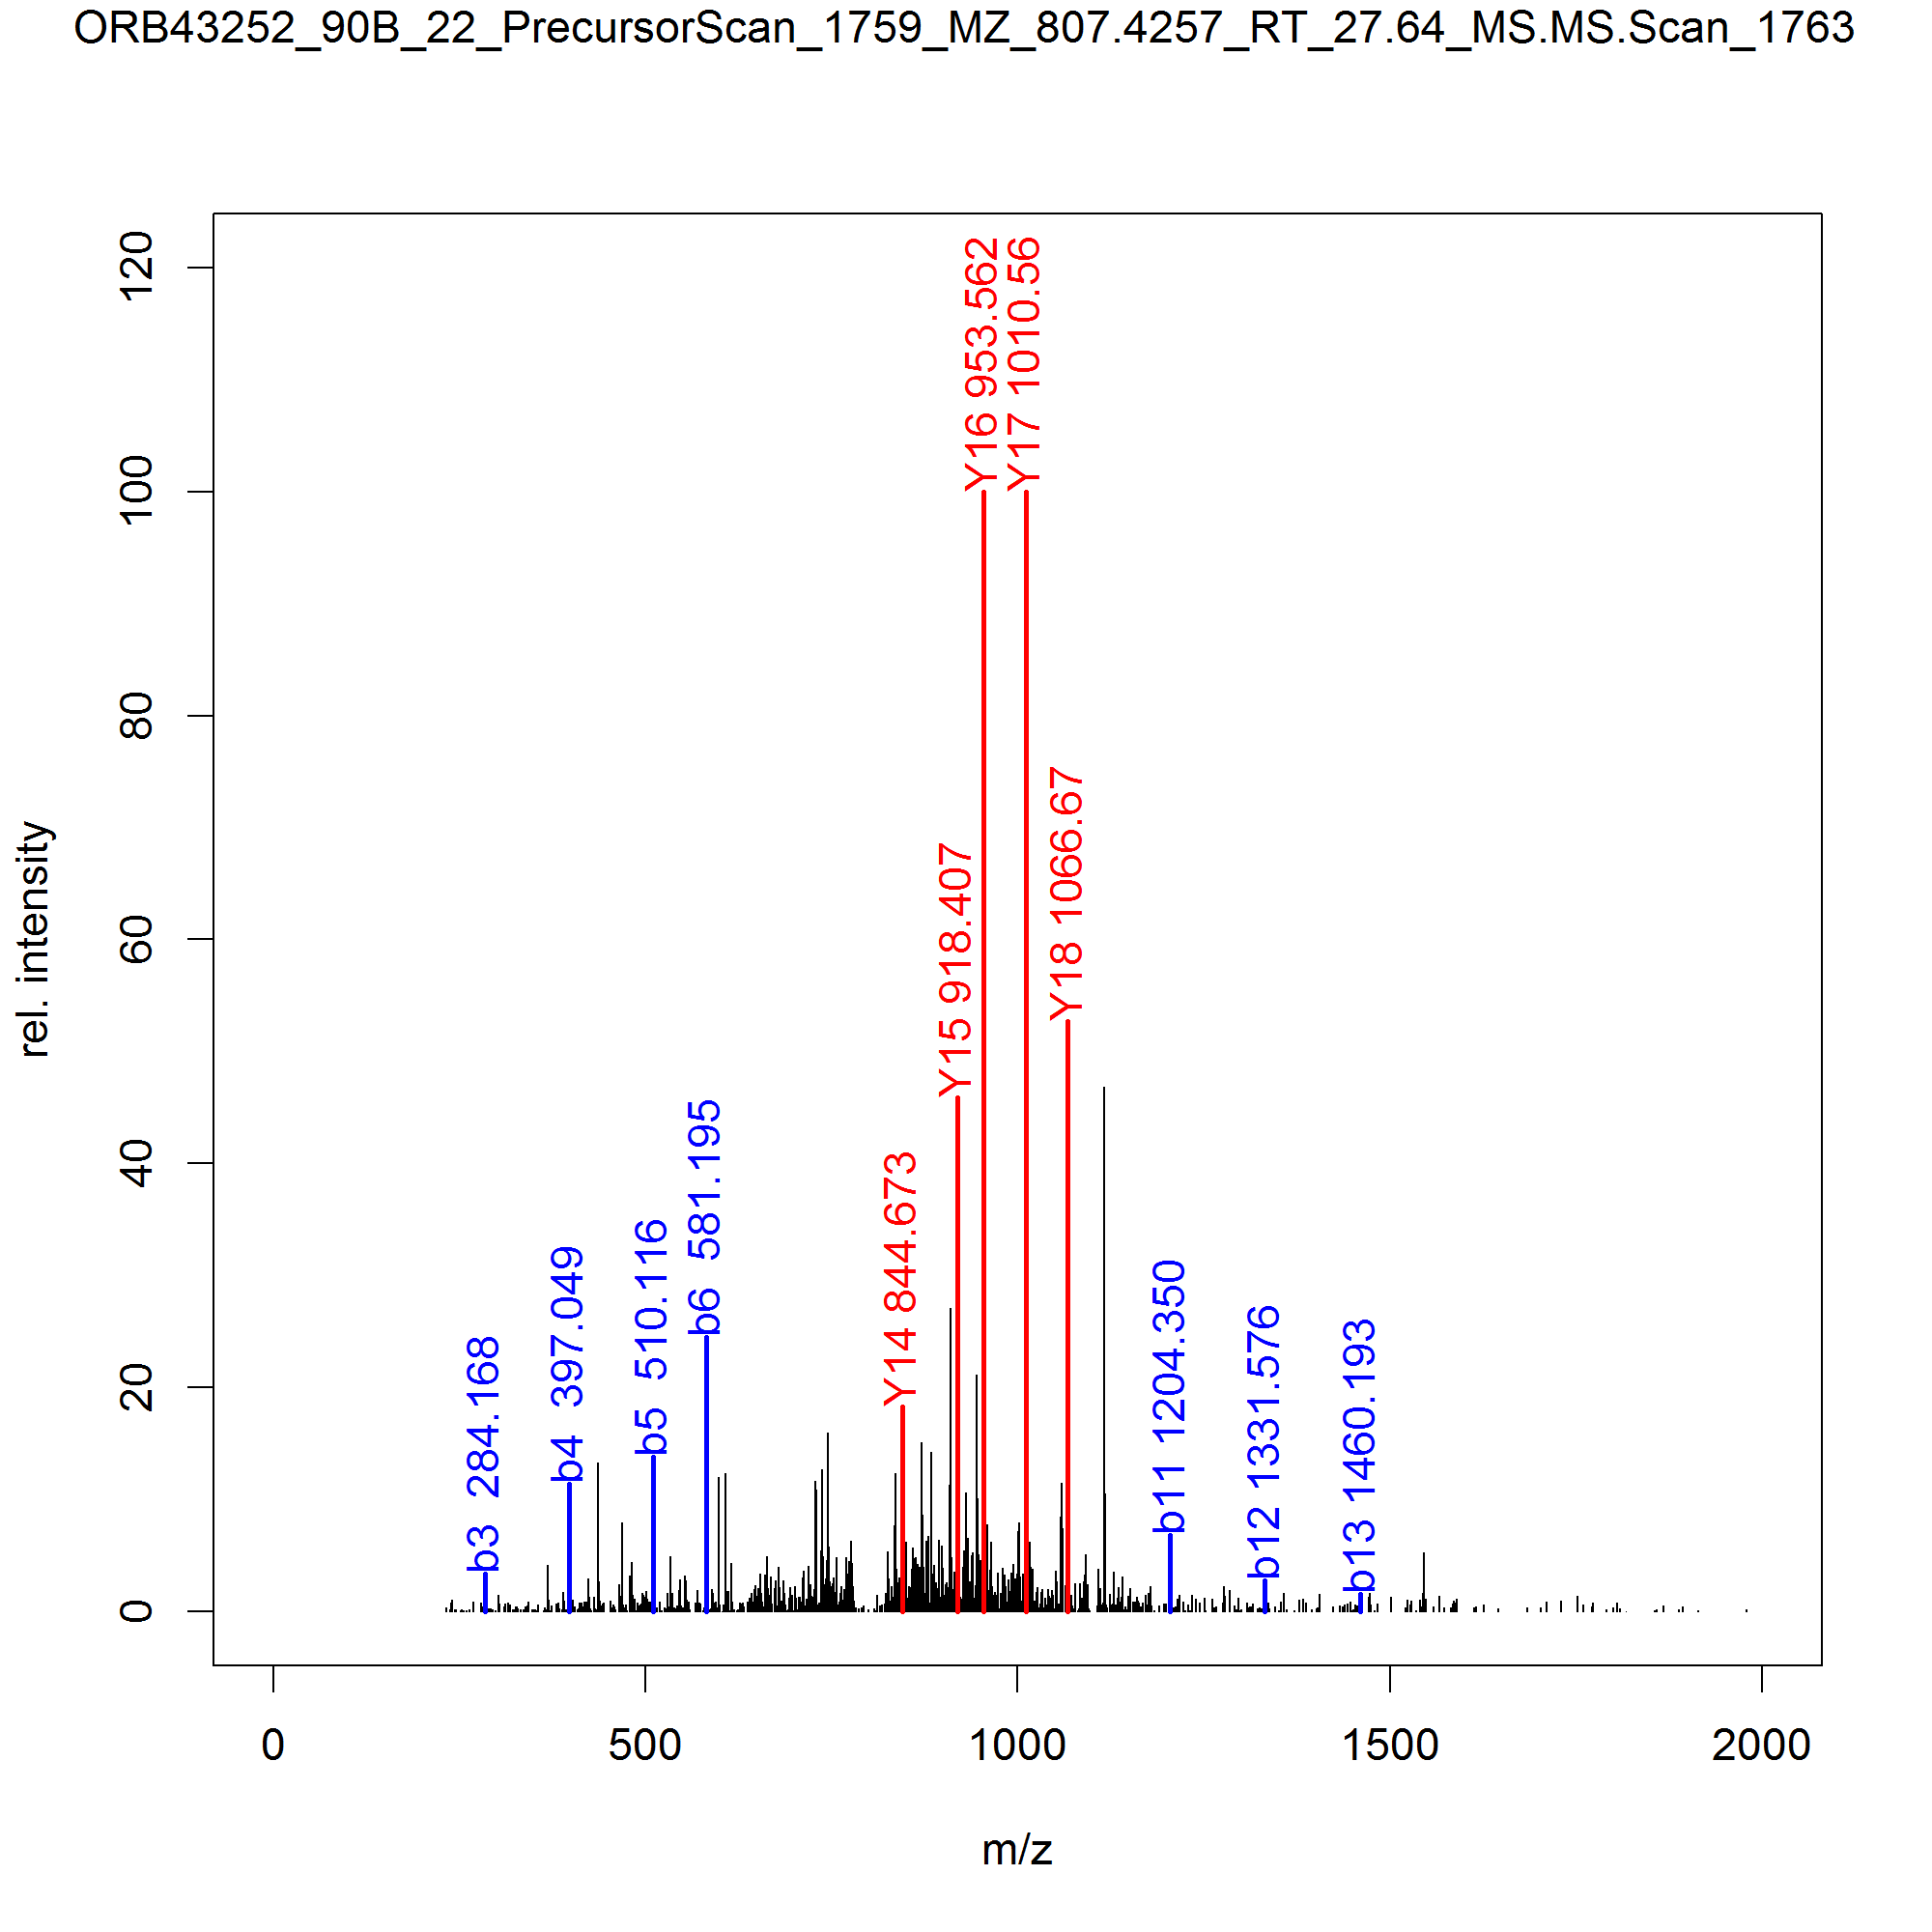


**807.43**


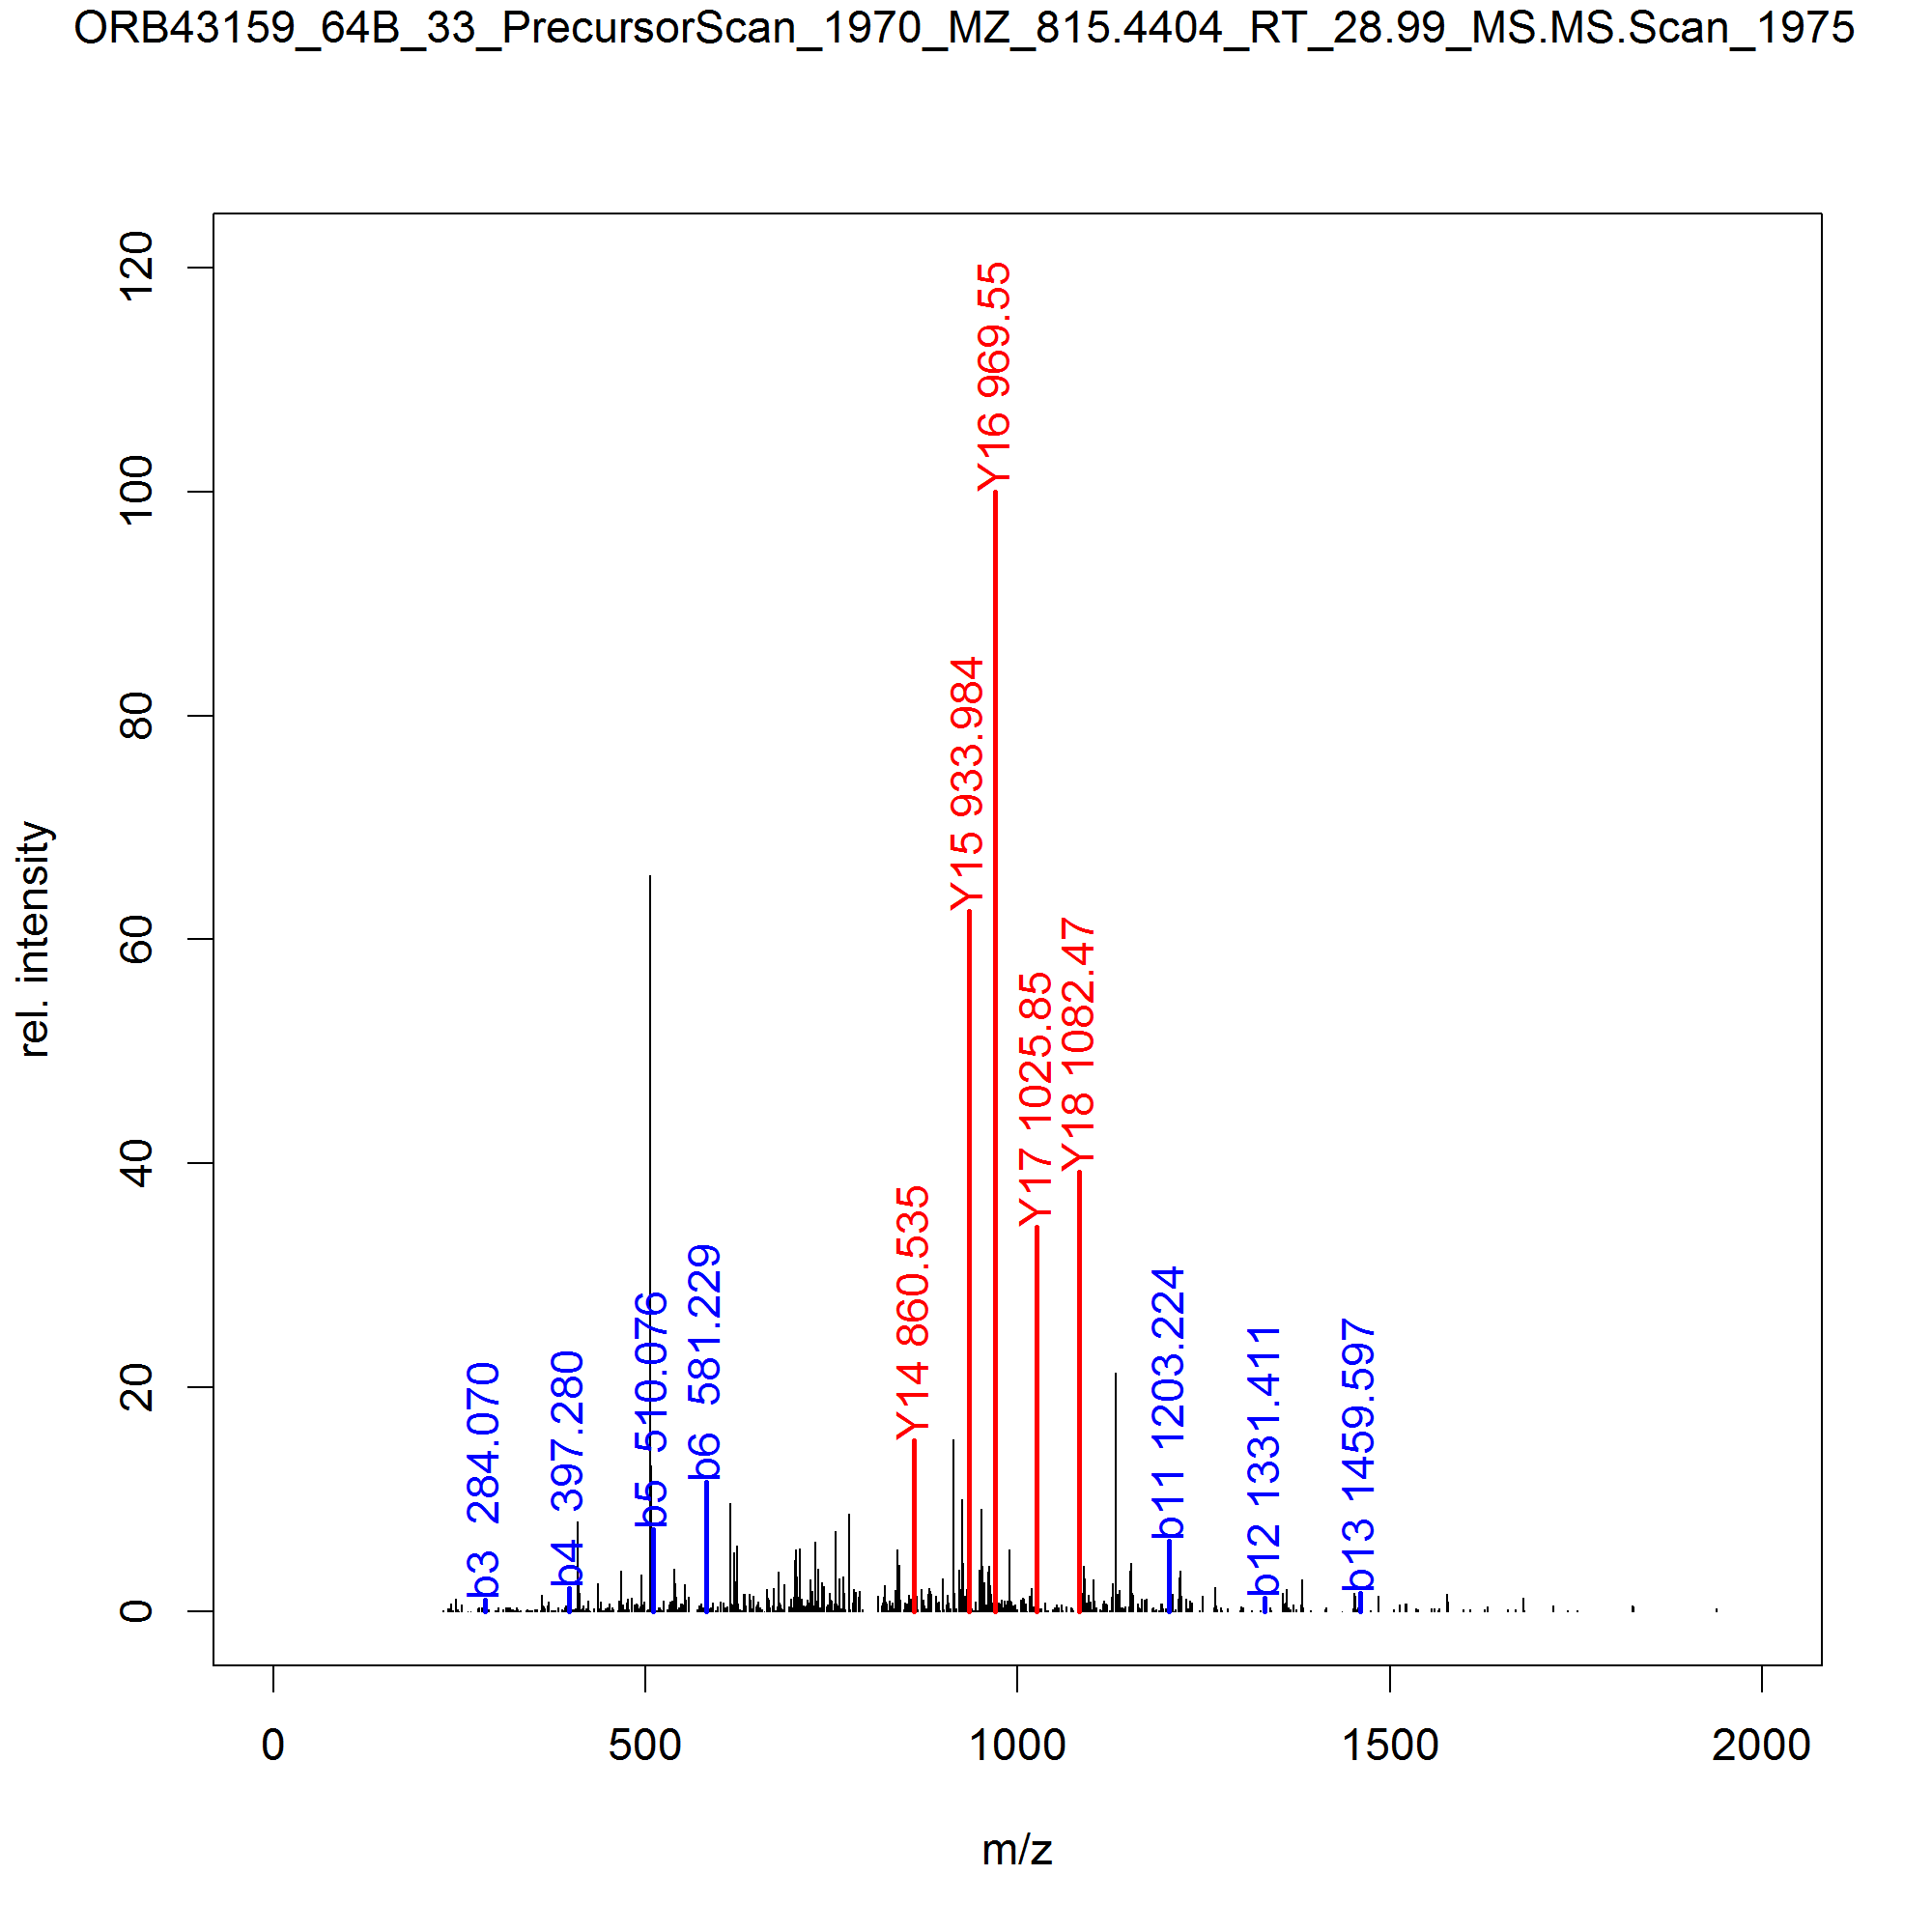


**815.44**


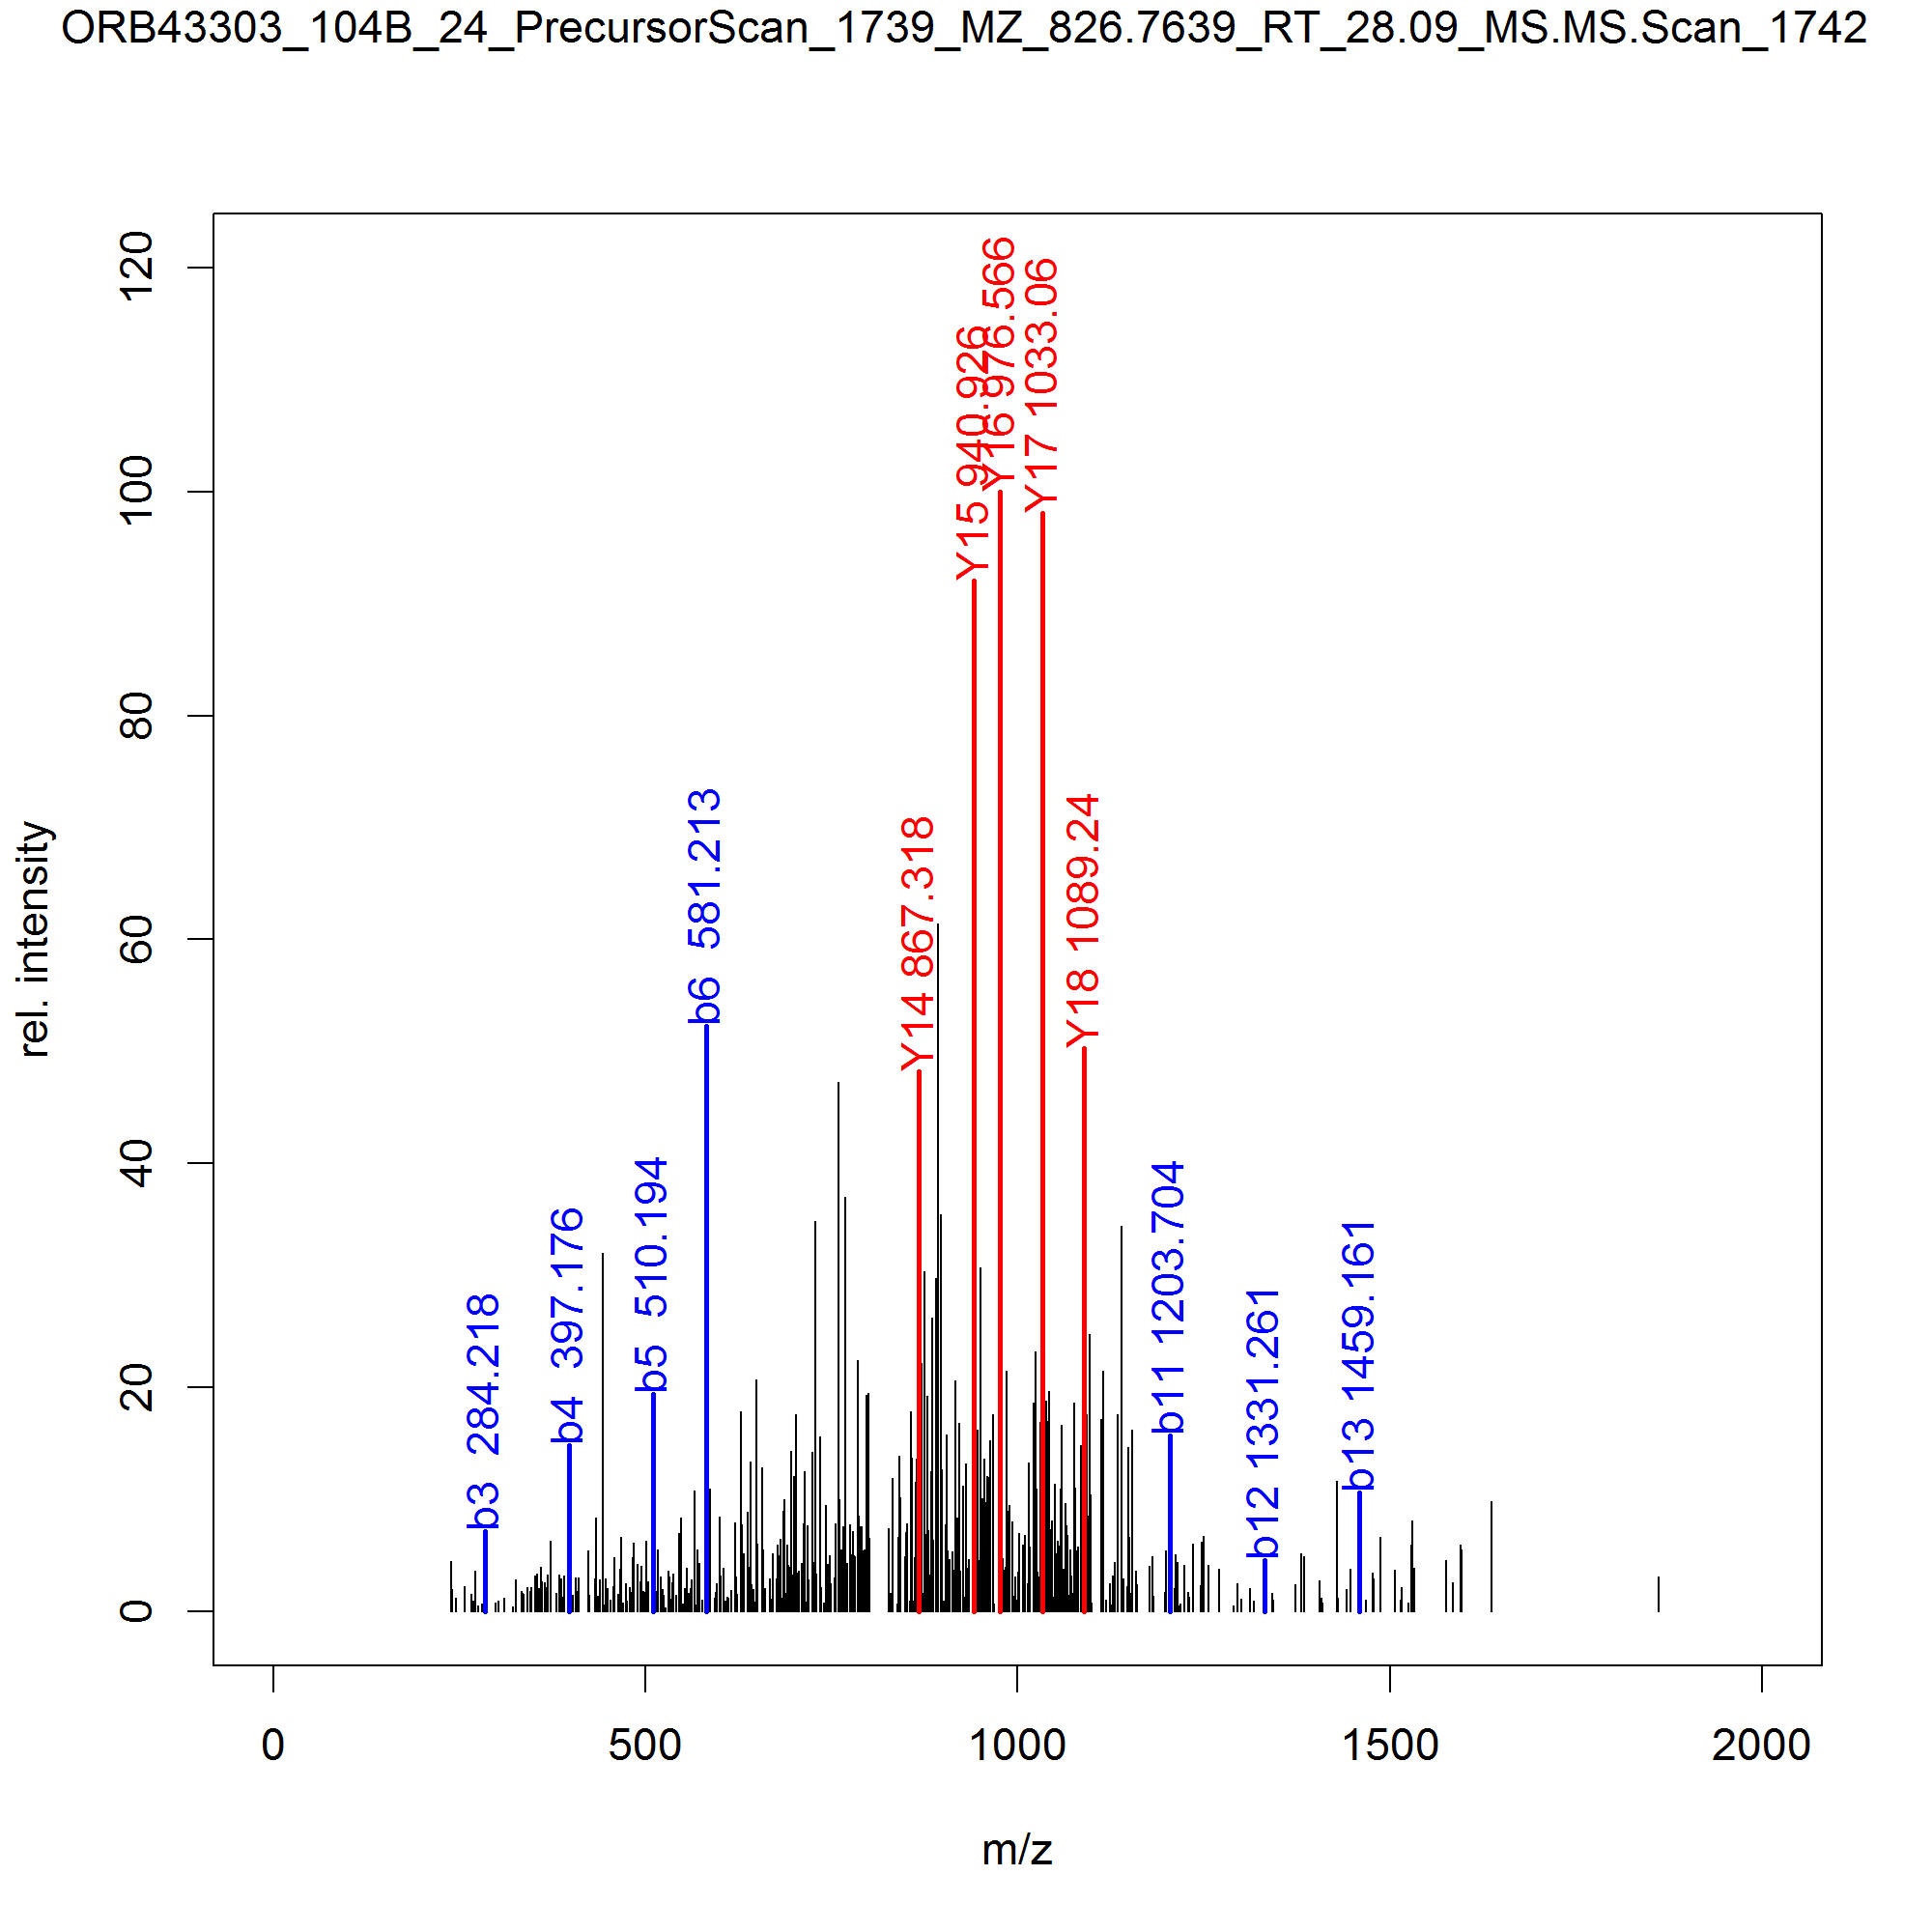


**826.76**


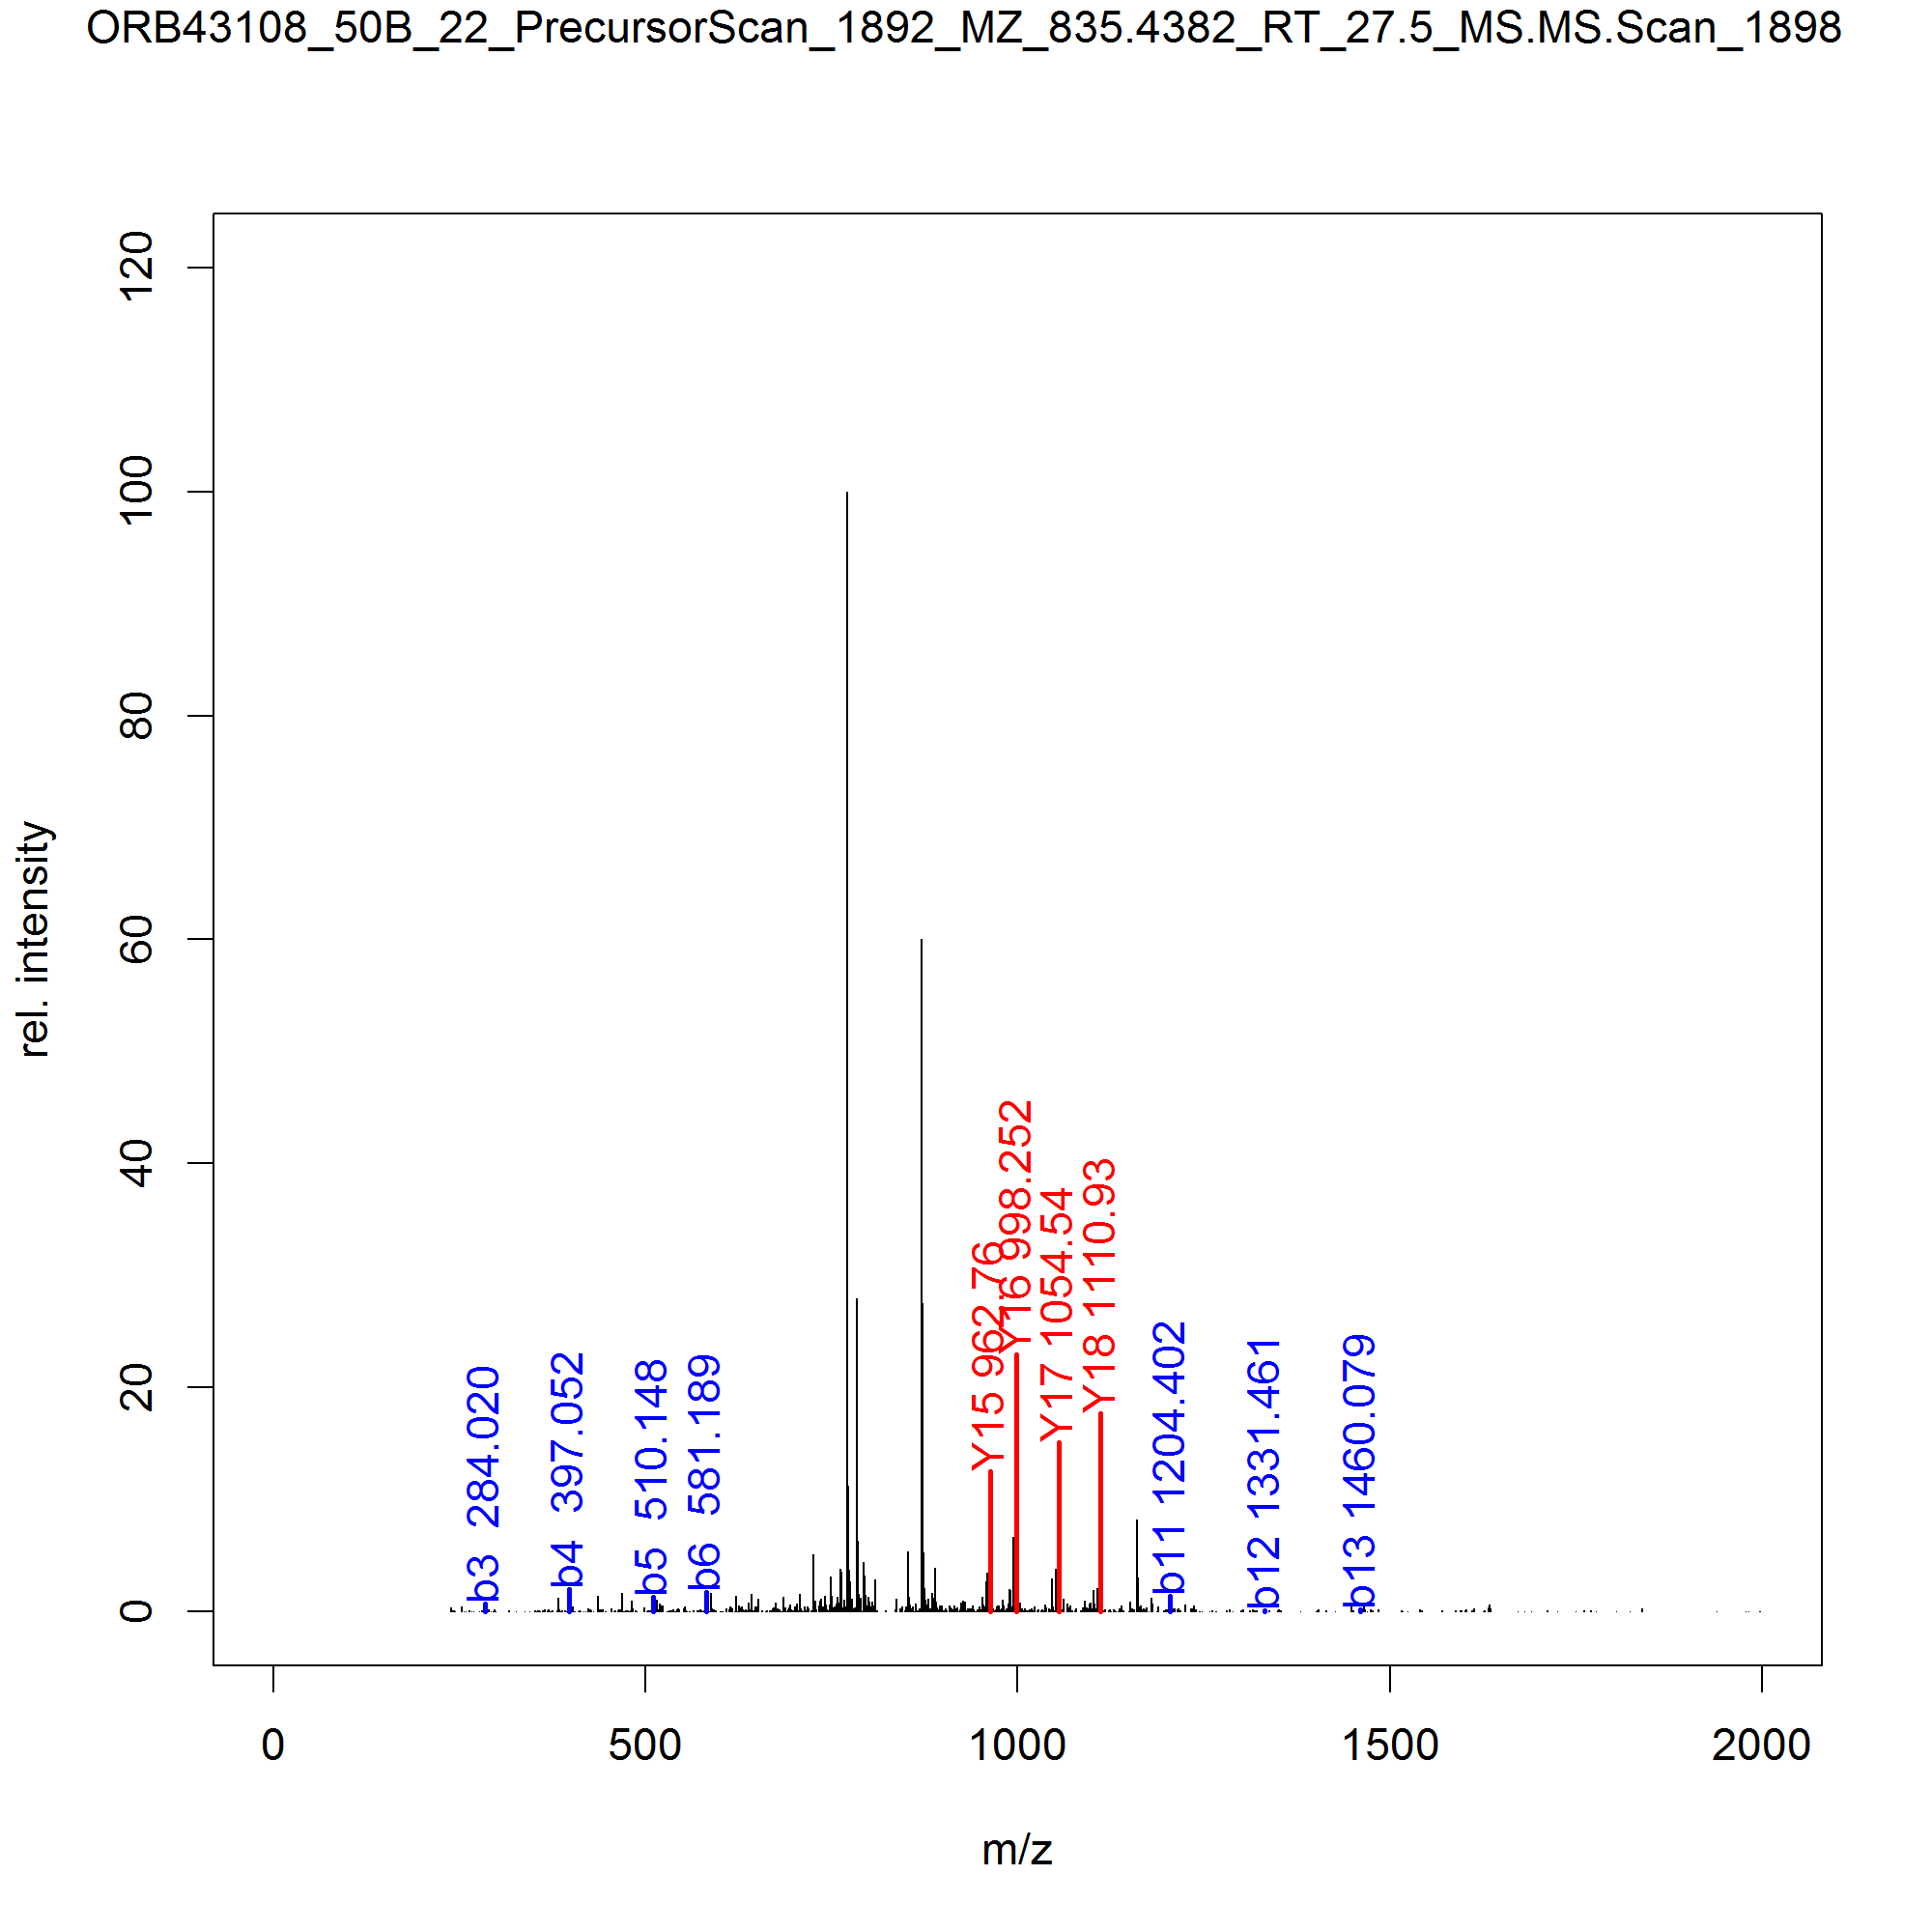


**835.44**


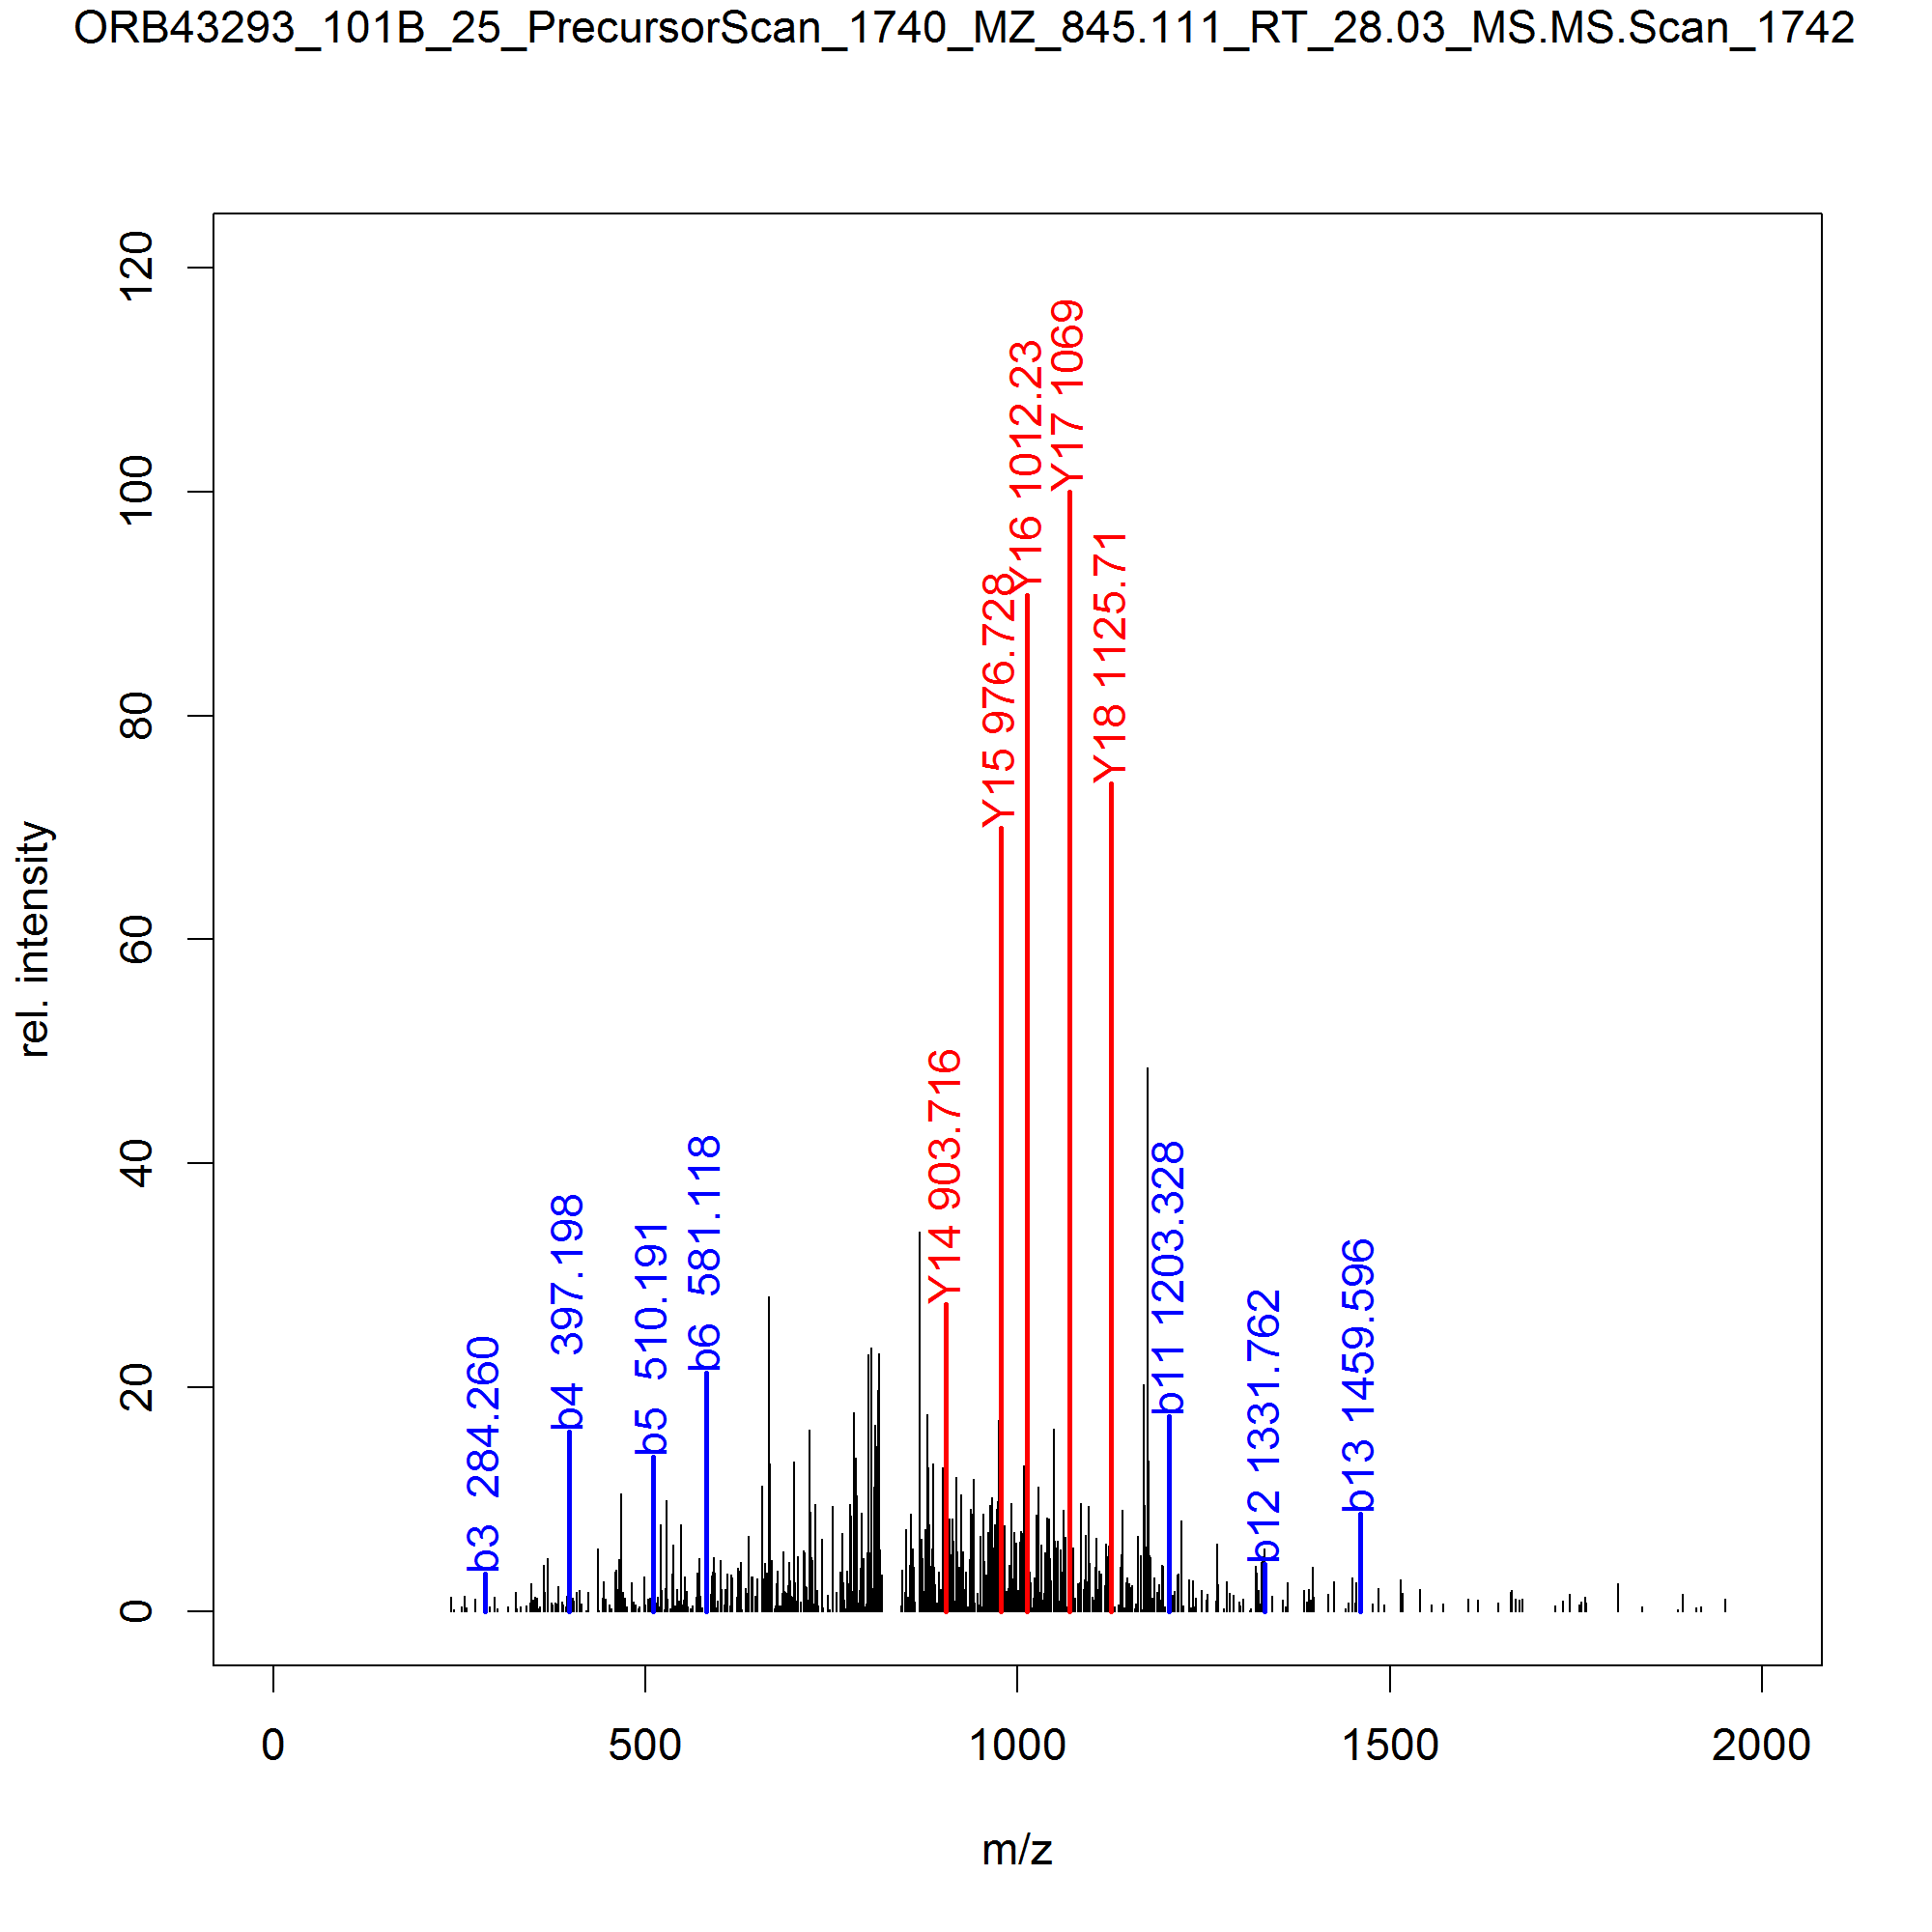


**845.11**


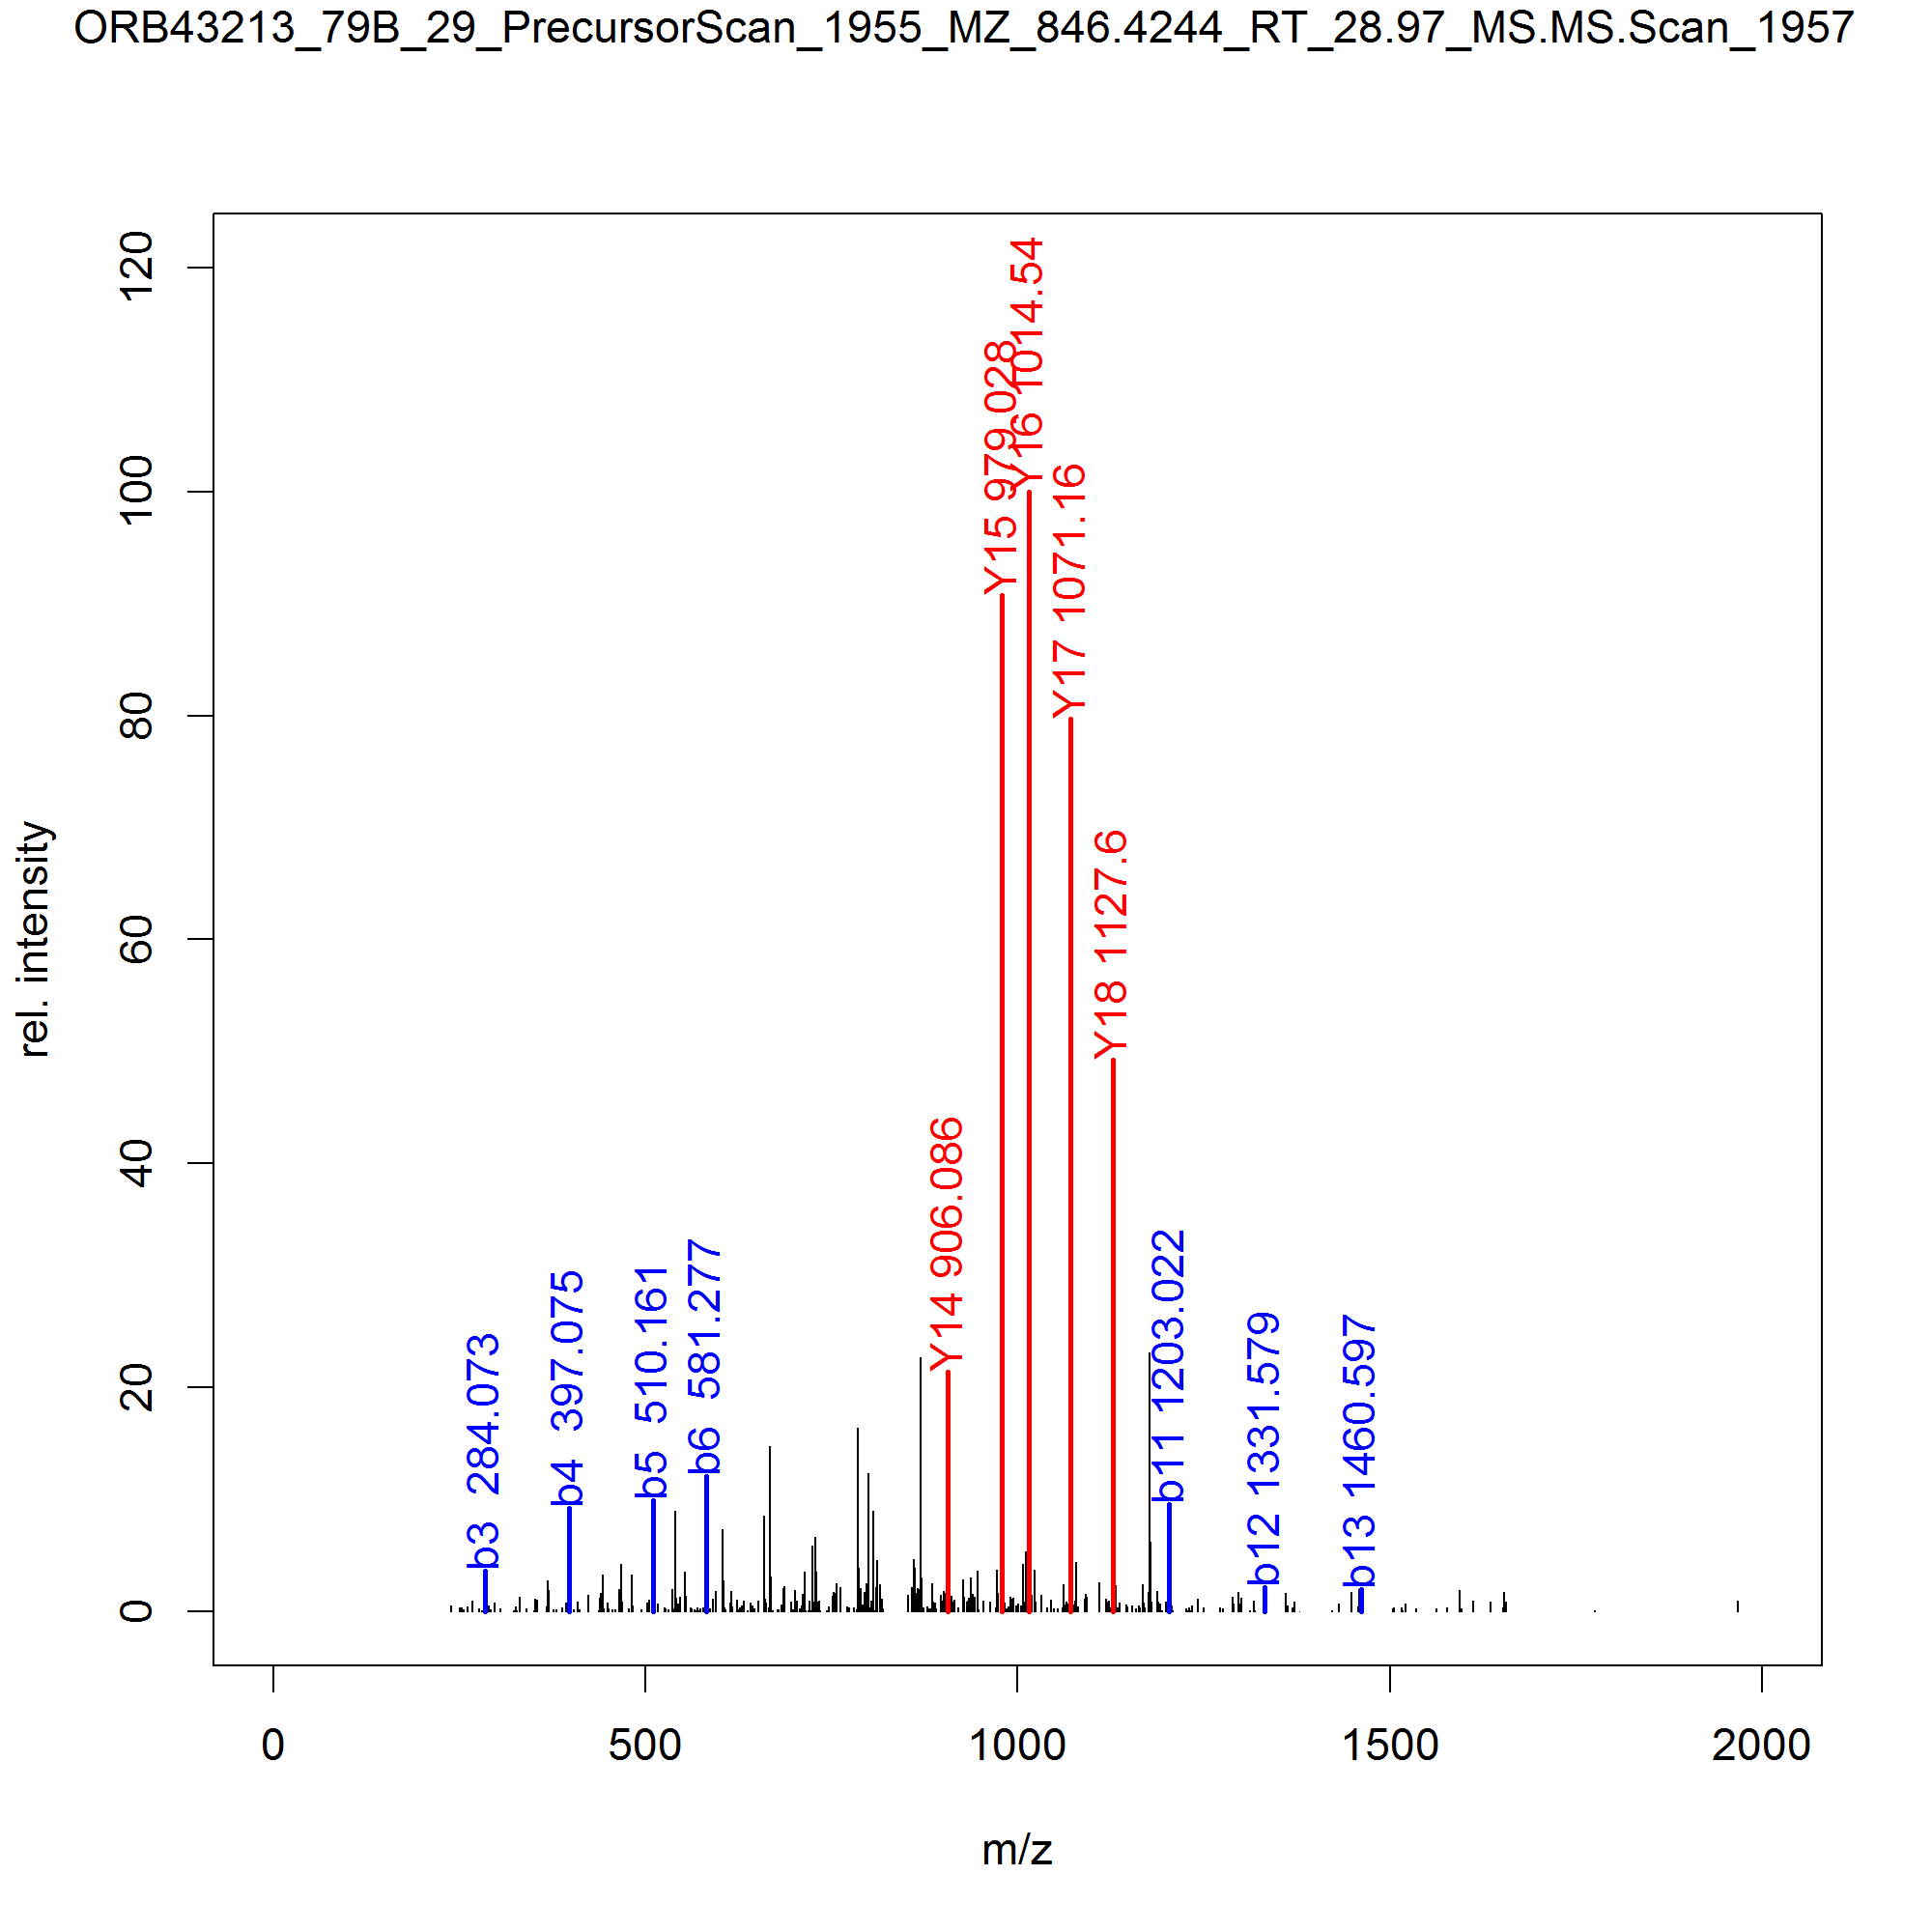


**846.42**


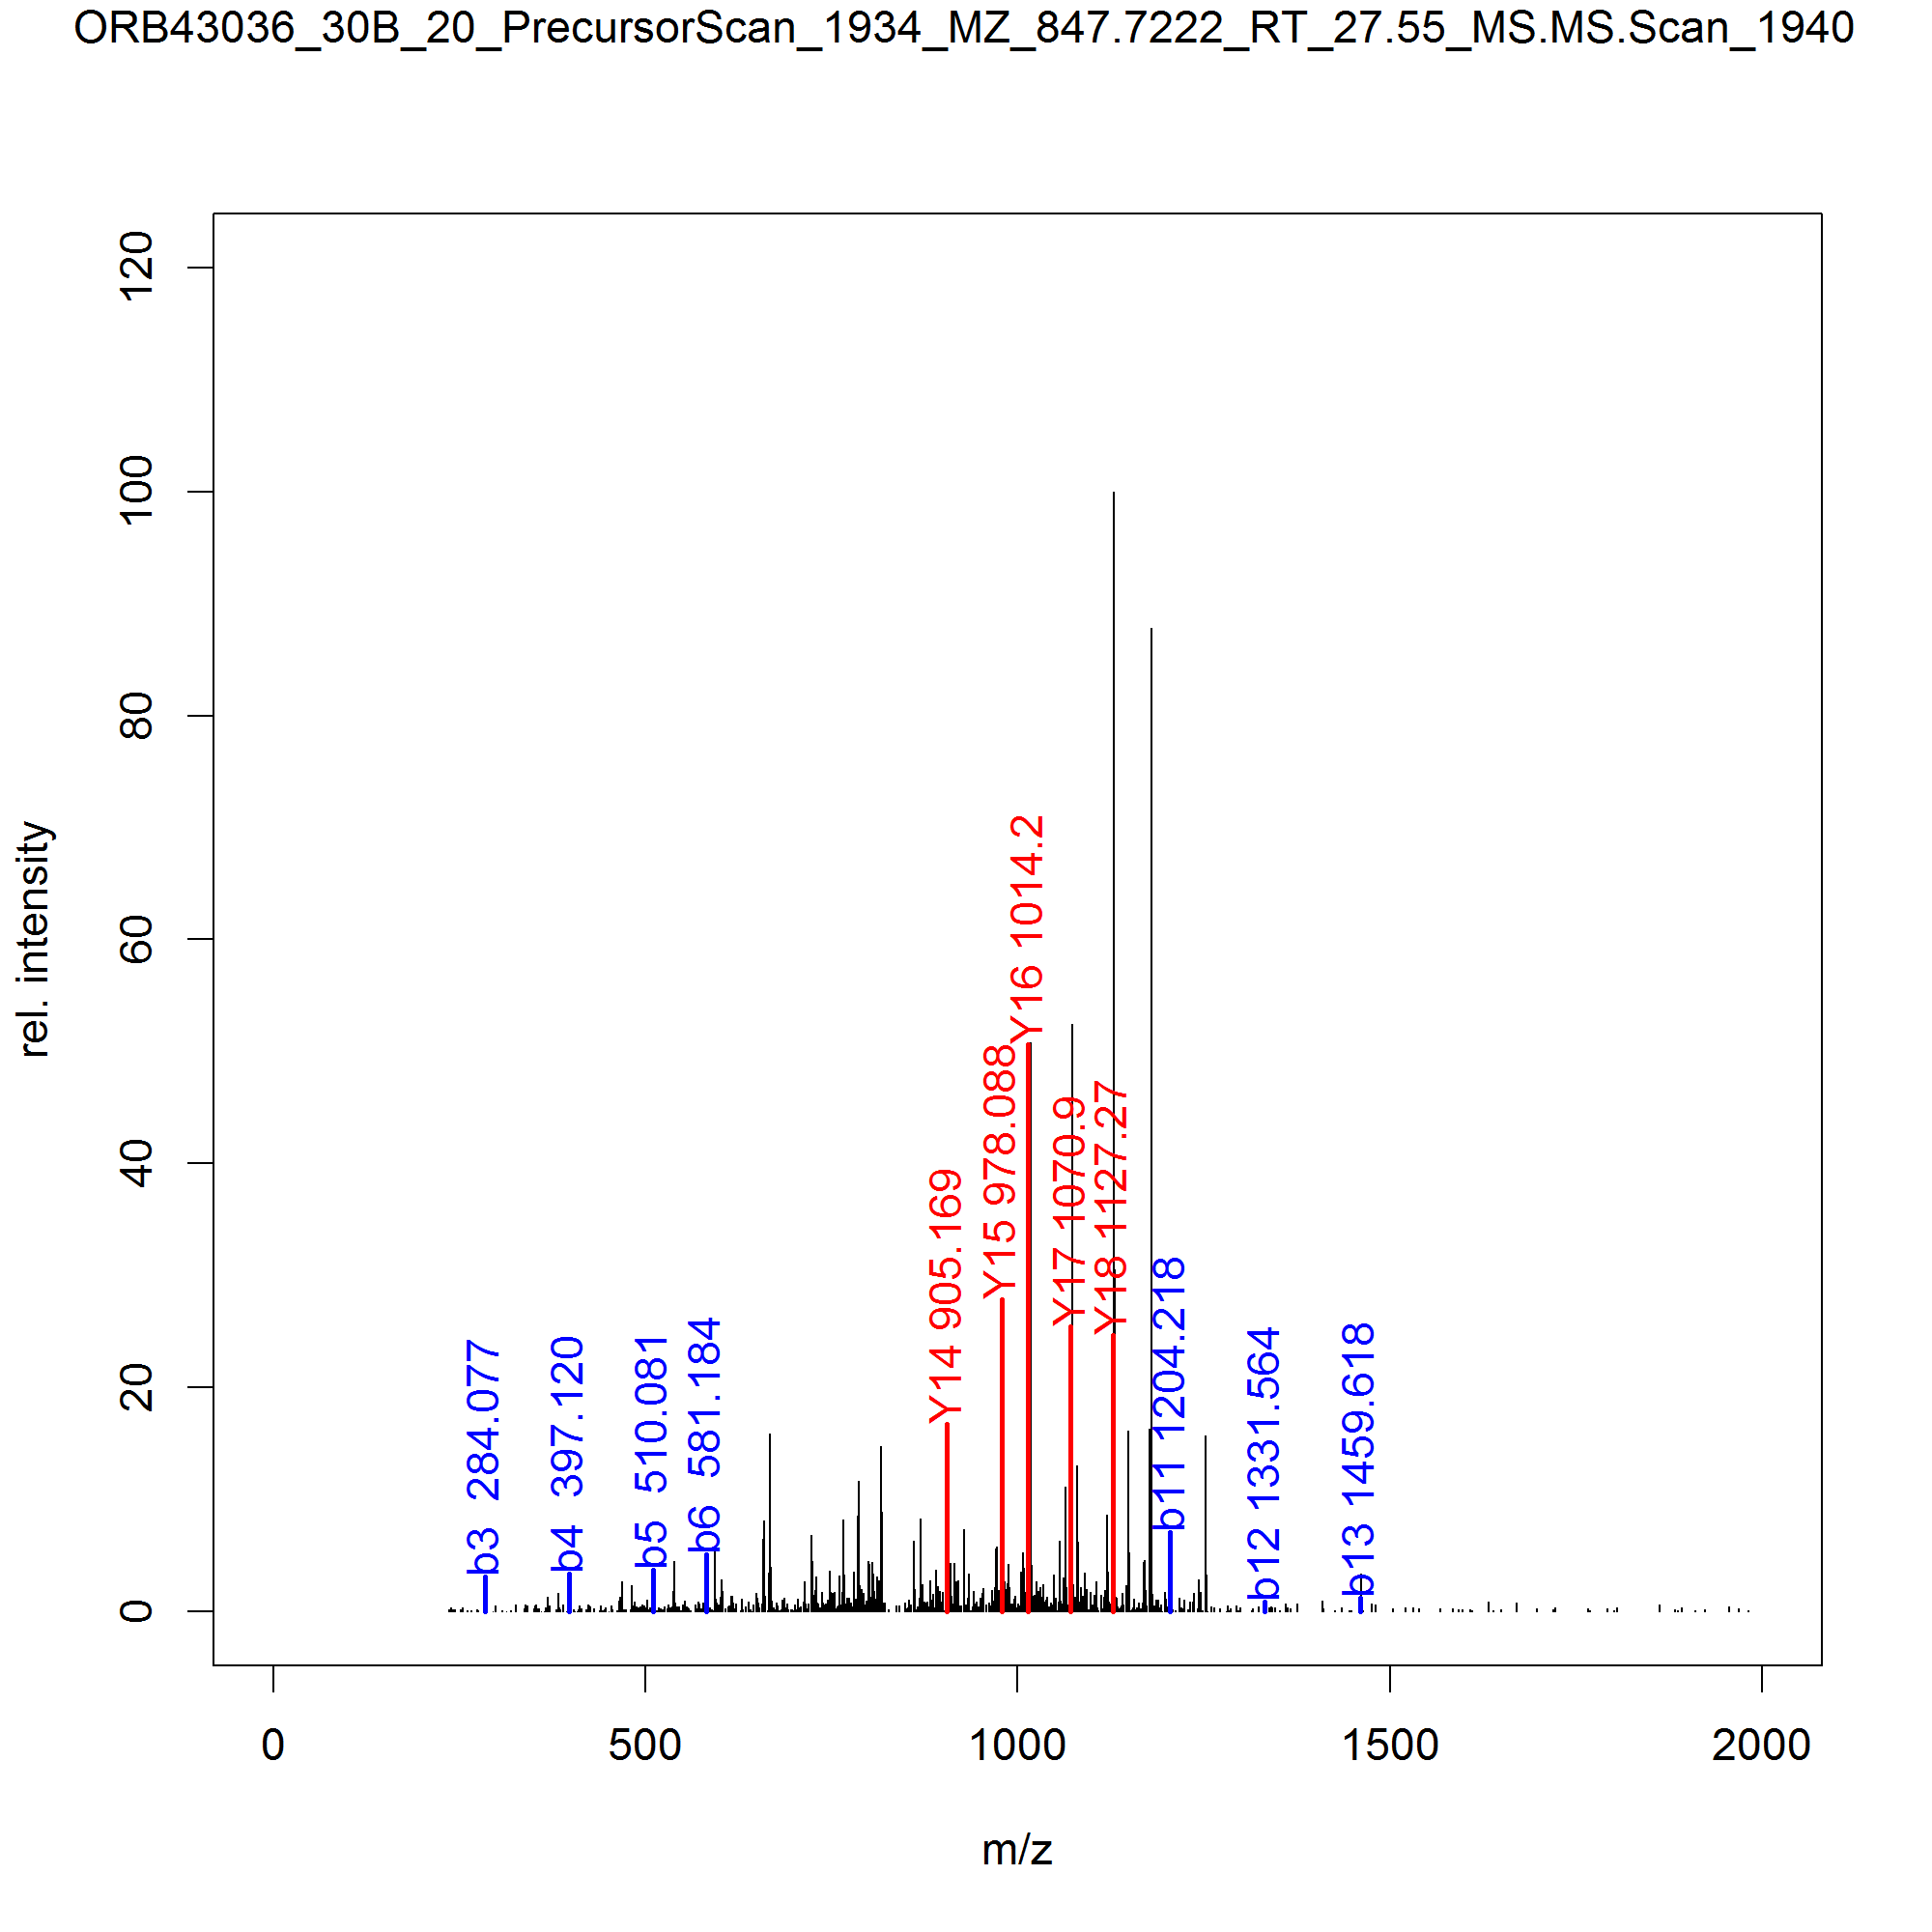


**847.72**


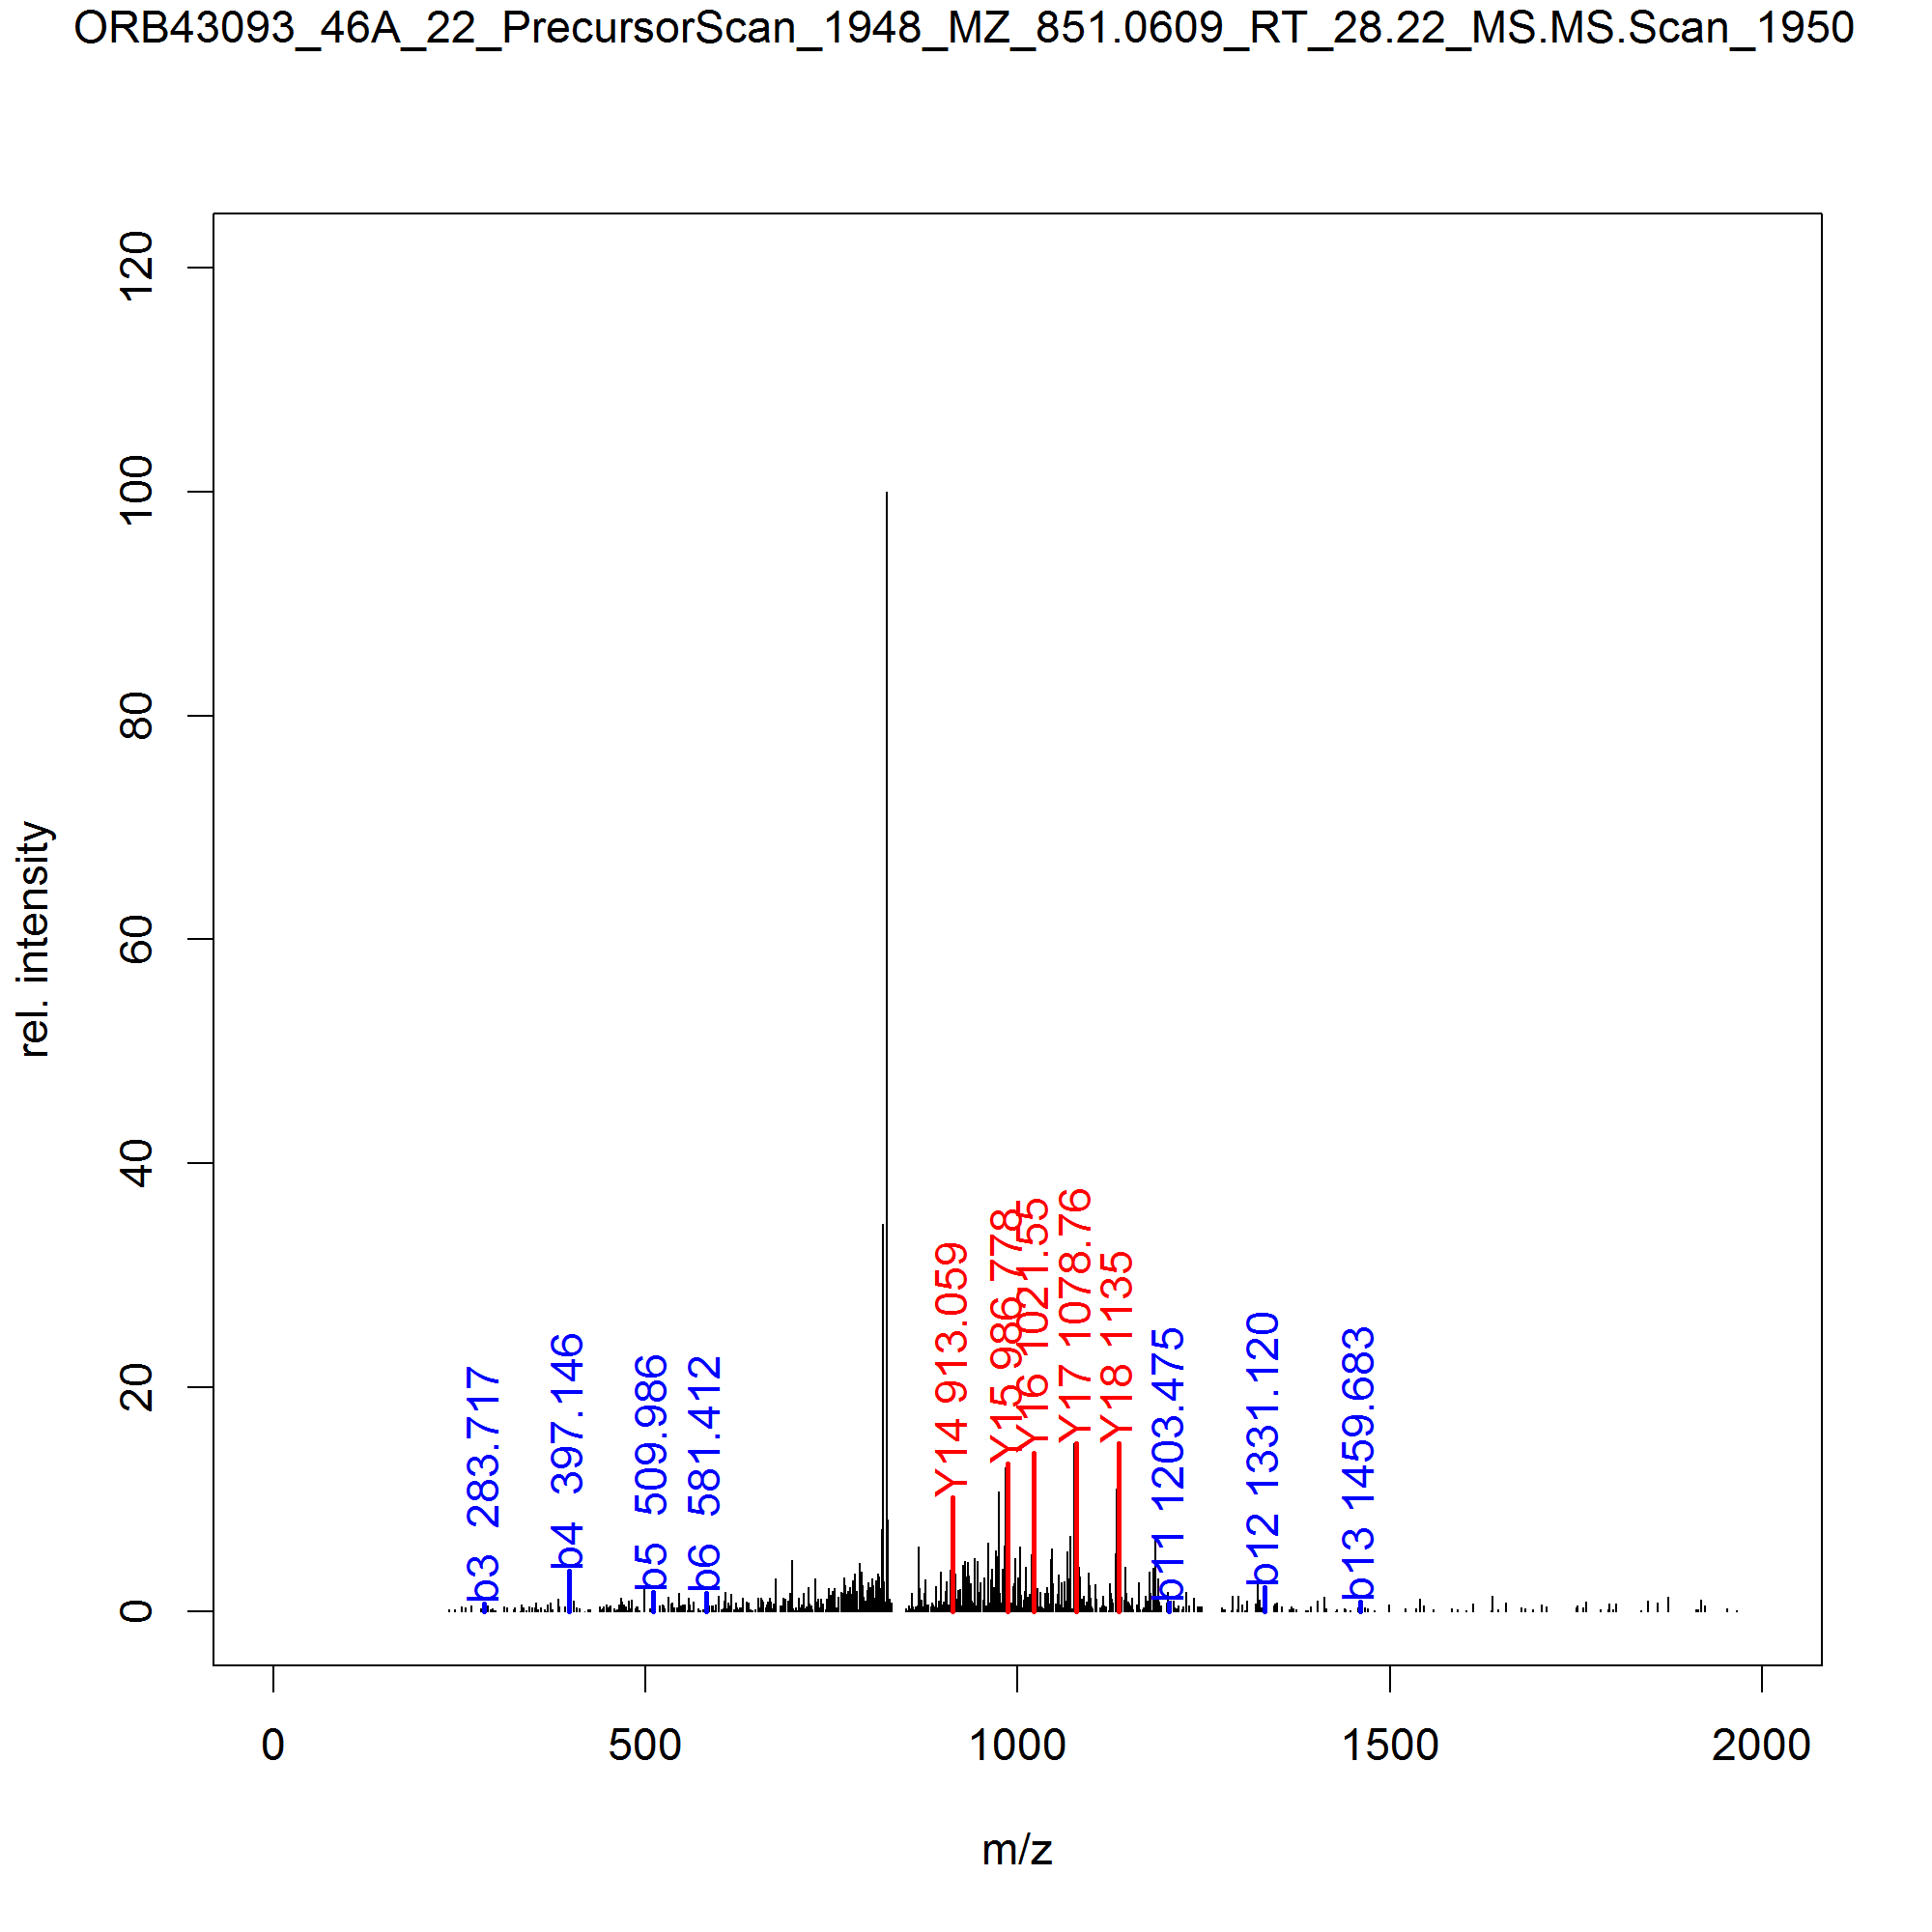


**851.06**


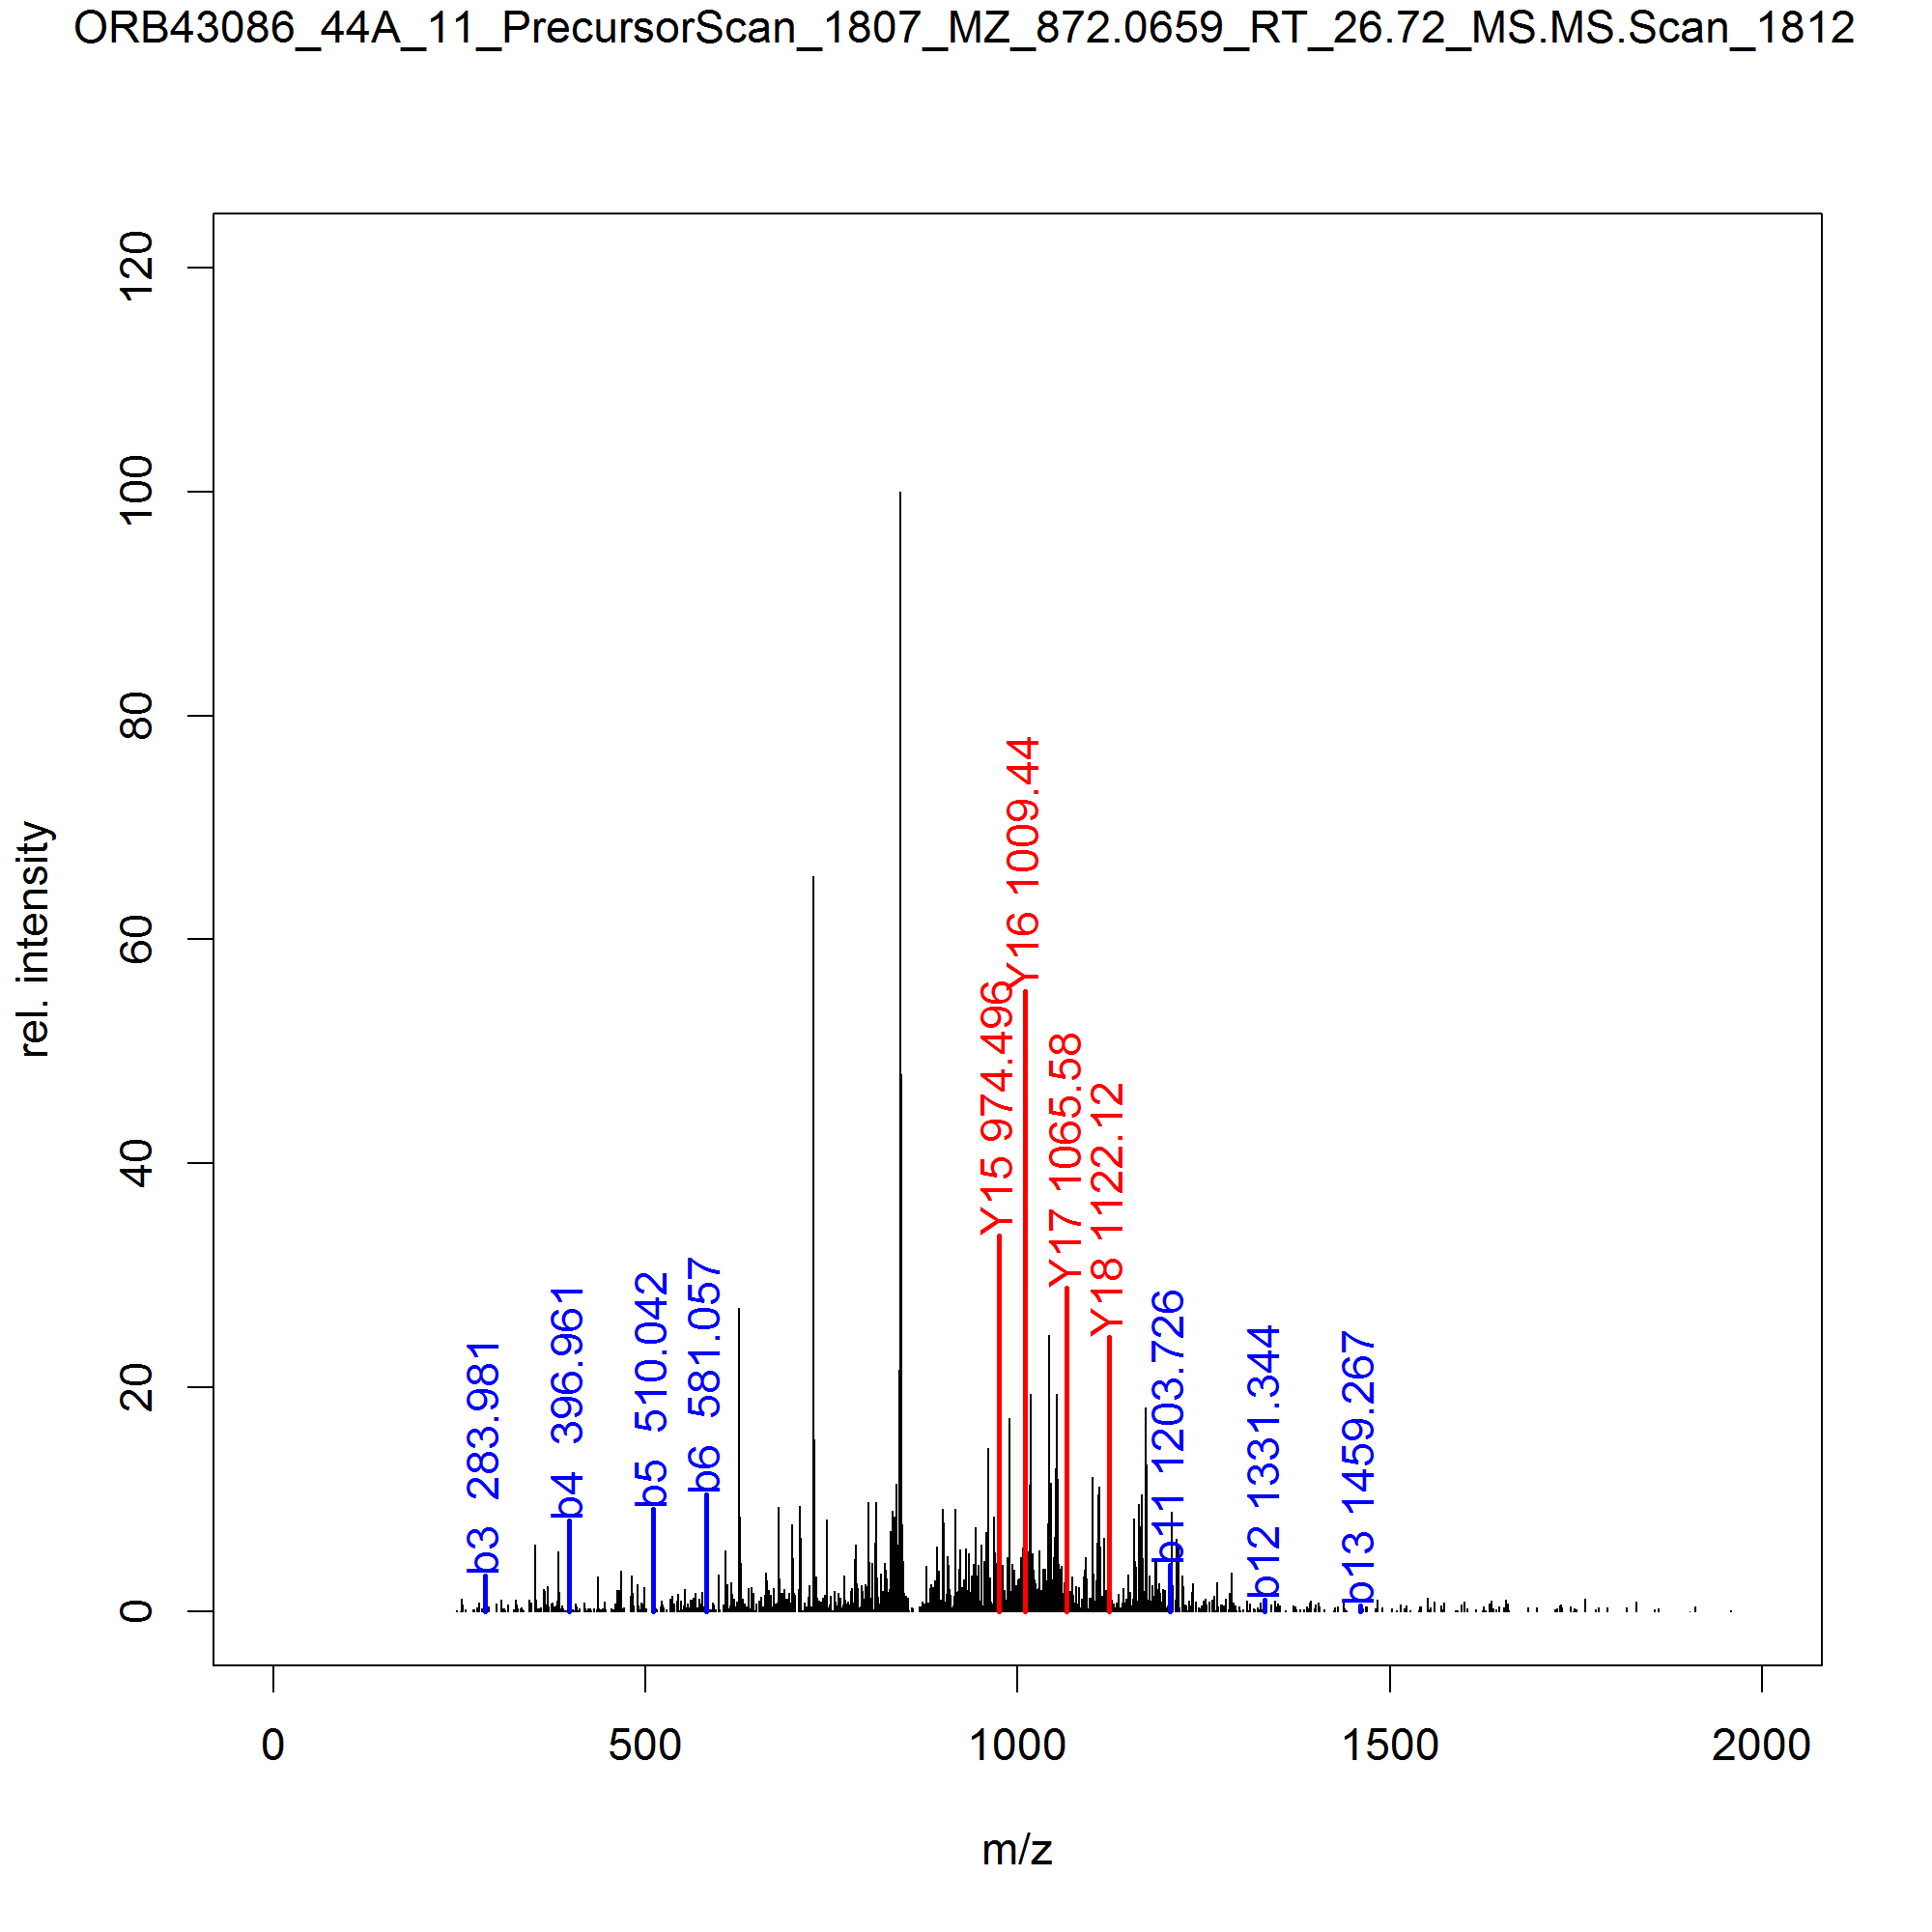


**871.73**


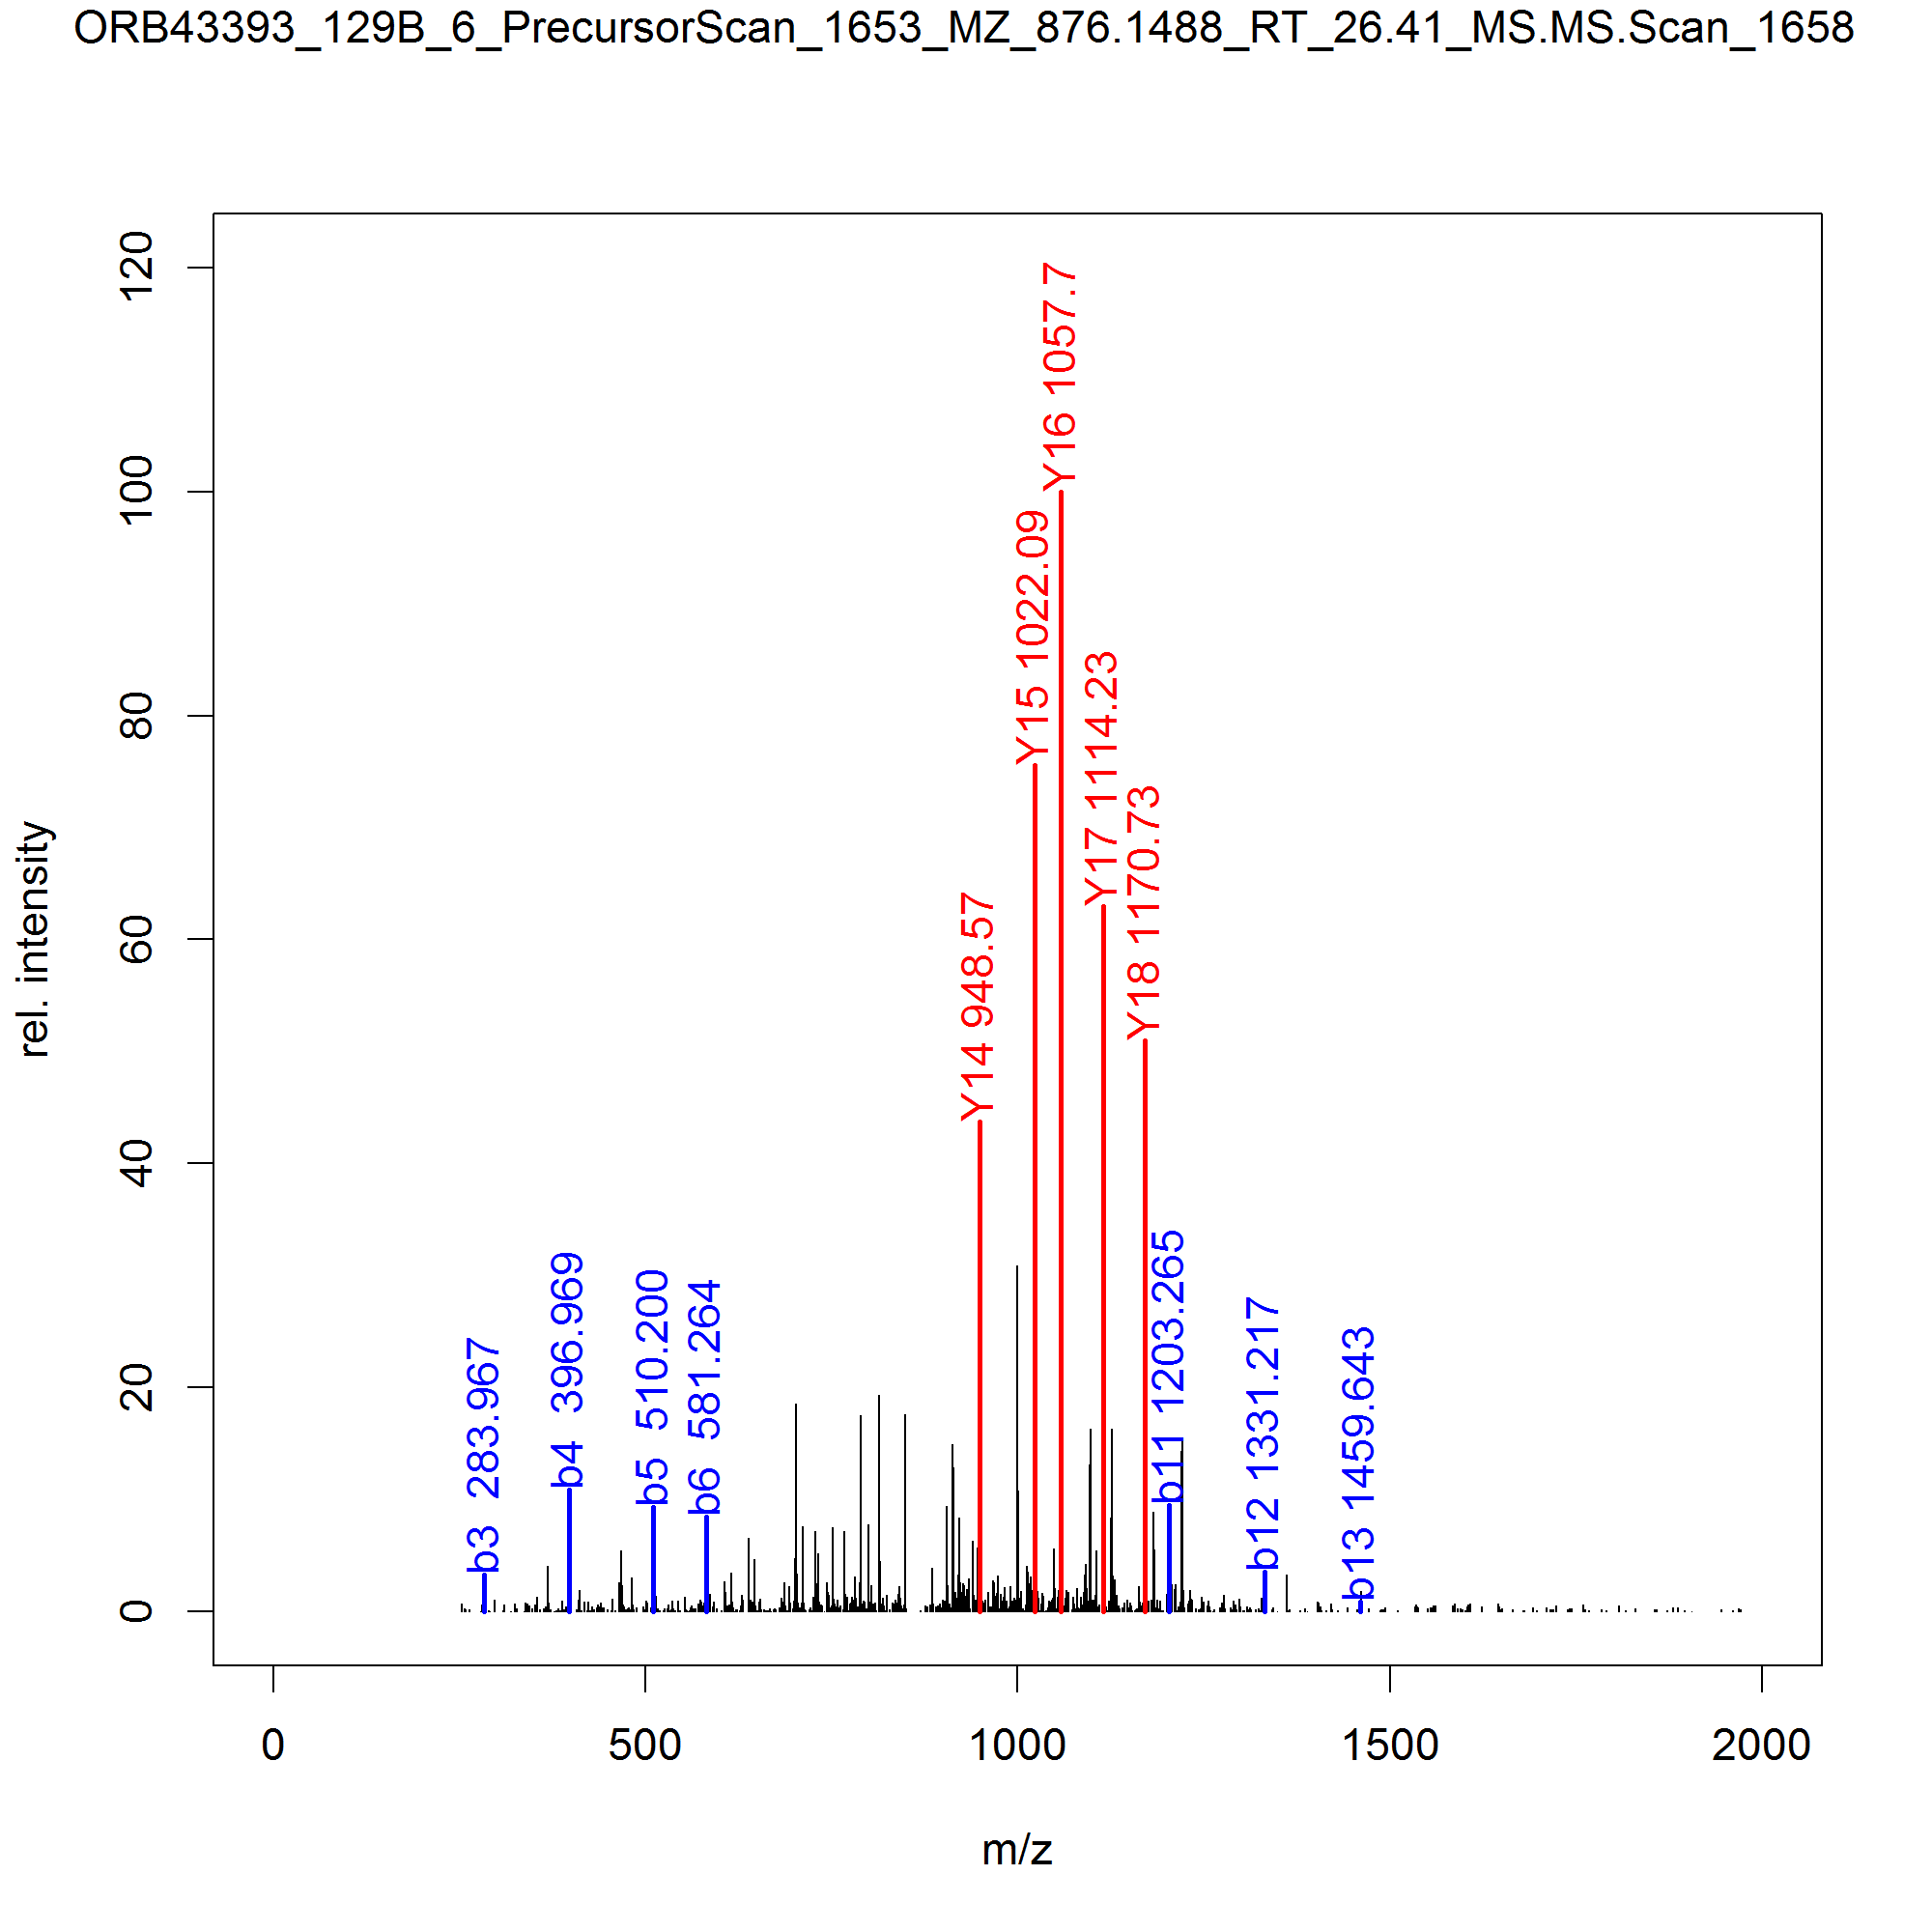


**876.15**


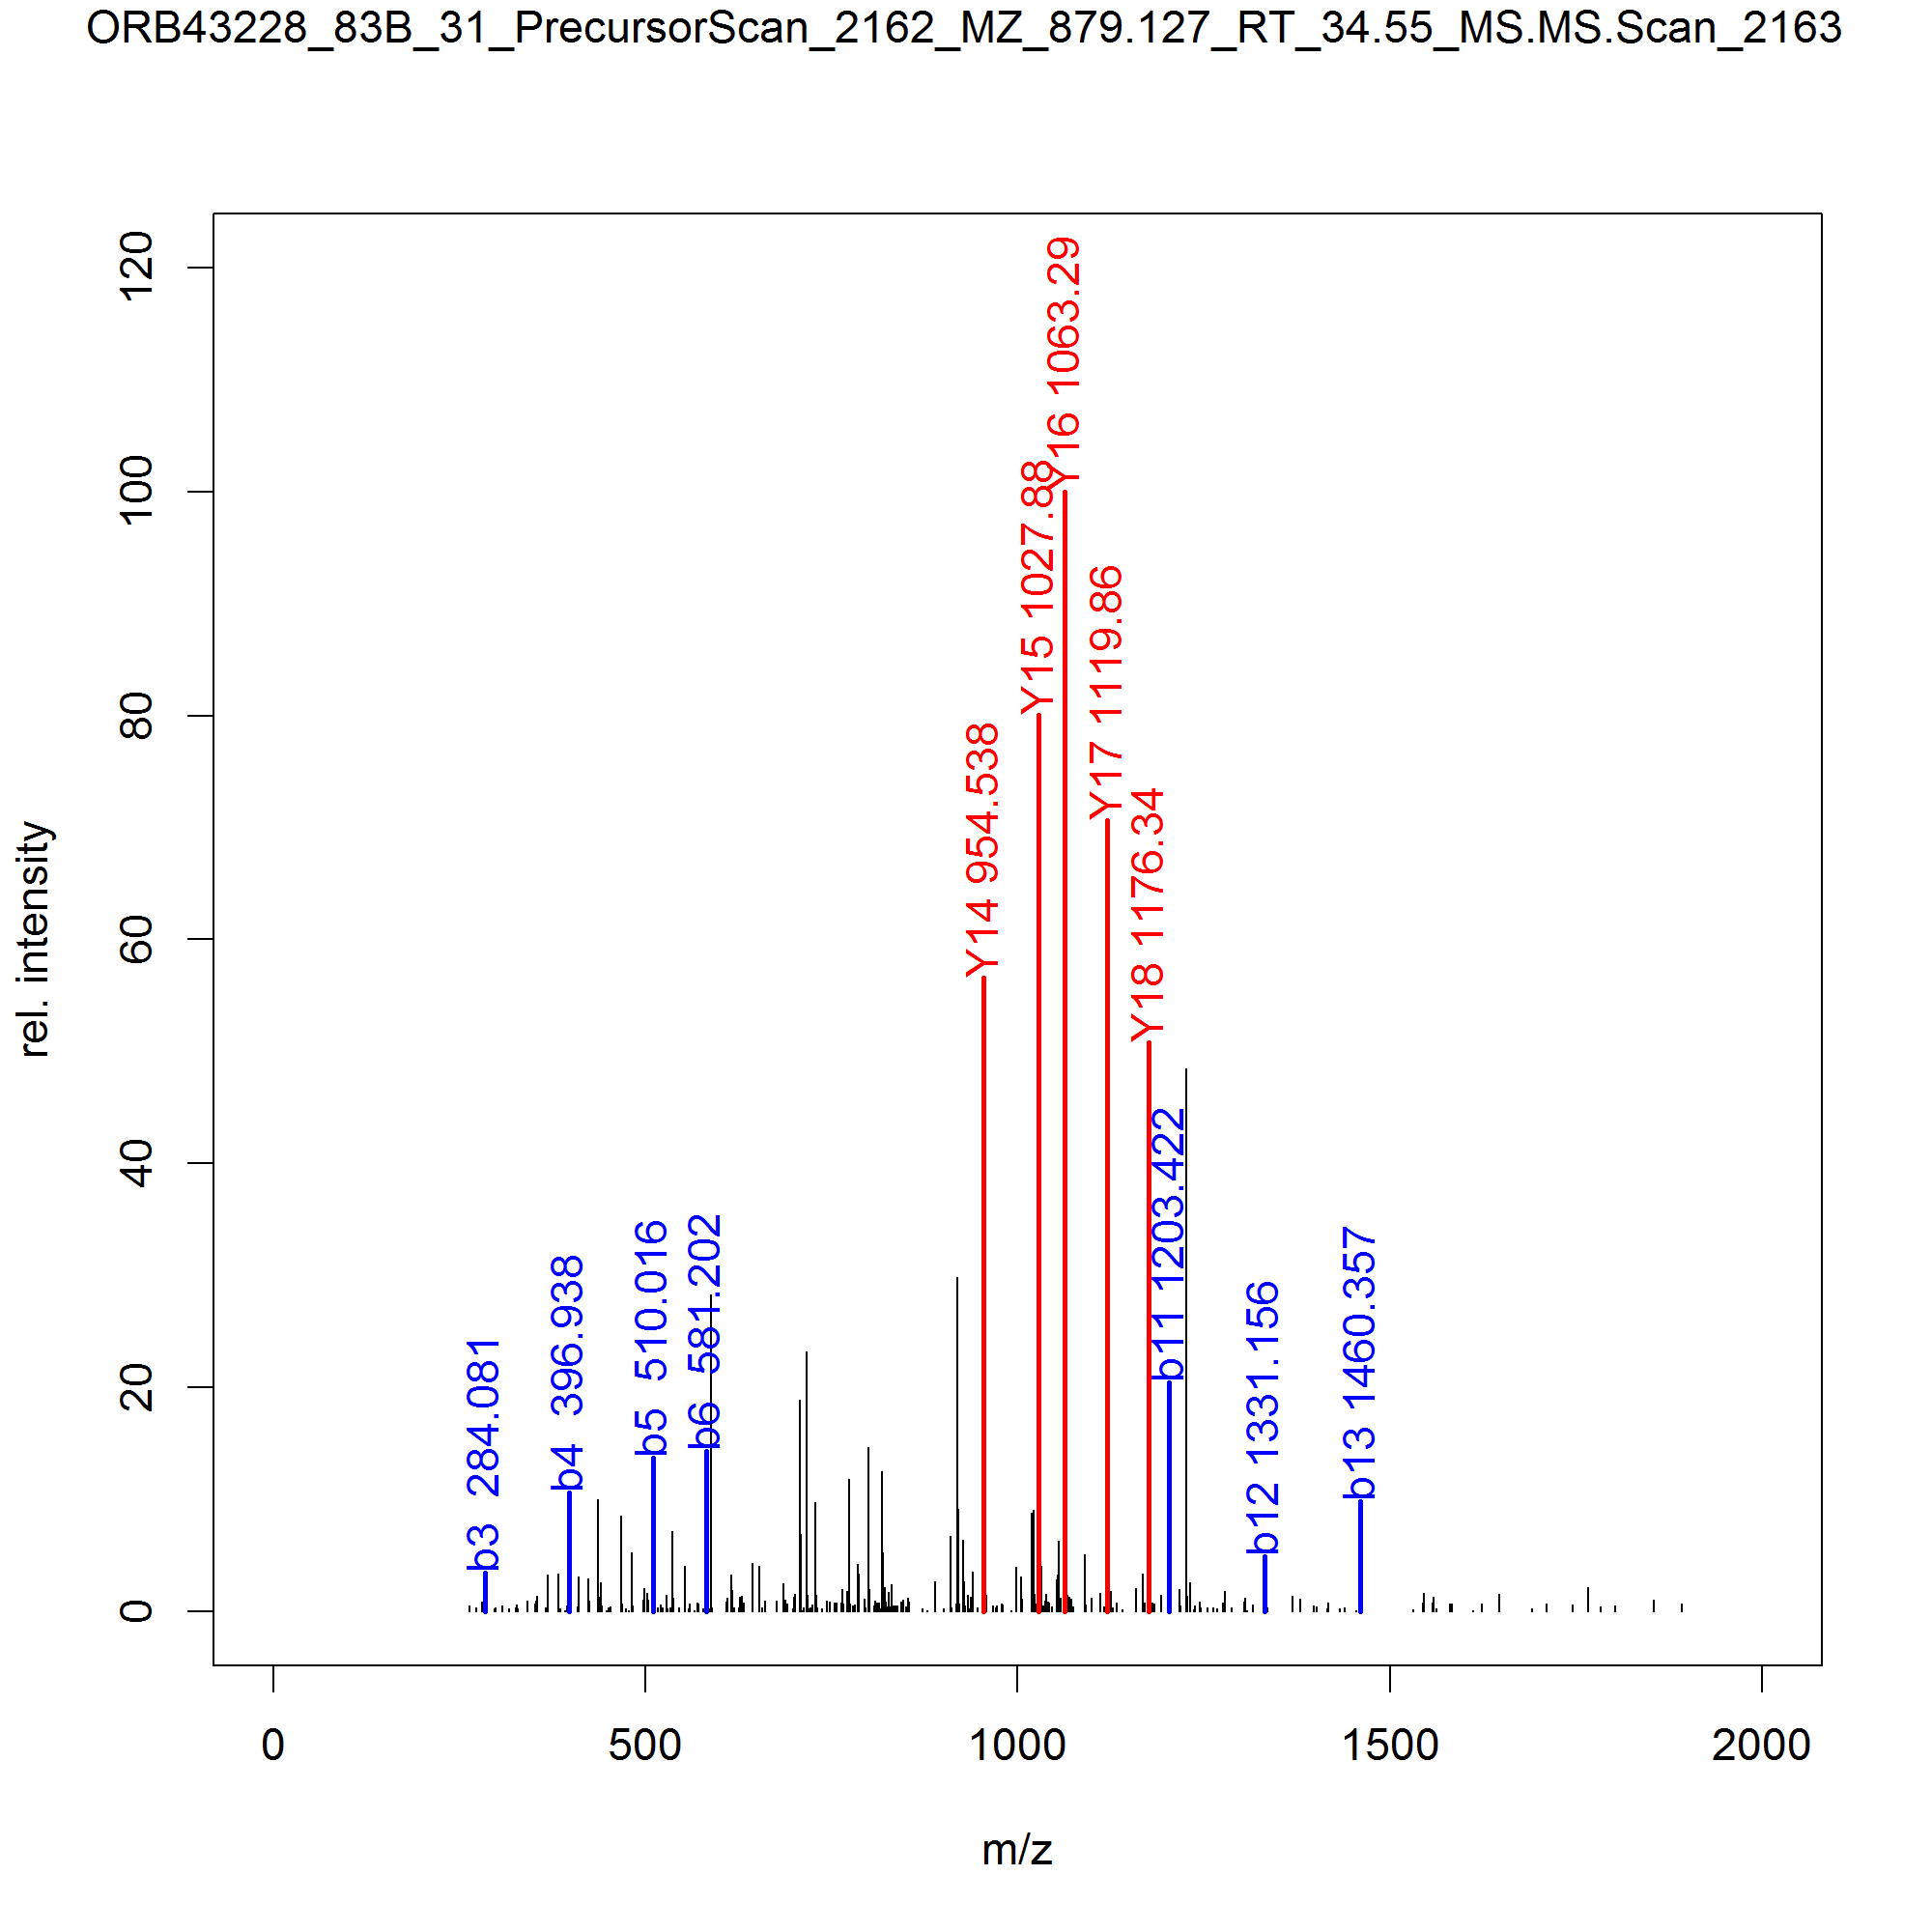


**879.13**

**Figure S2**. Selected ion chromatograms (SICs) (top) and MS1 spectra (bottom) of 12 T3 adducts found to be unique to the current study. The monoisotopic mass (MIM) of each adduct was selected using a mass tolerance of 2 ppm. The adduct ID is shown on the left upper corner of each spectrum. (See Table 1 in the main manuscript for adduct annotations).

**805.09**

**807.43**

**815.44**

**826.76**

**835.44**

**845.11**

**846.42**

**847.72**

**851.06**

**871.43**

**876.15**

**879.12**

**Figure S3.** Clusters of adducts selected by the partitioning around medoids (PAM) method (k=6 ‘pam’ function in R) using Spearman correlations of the normalized abundances.

**Figure S4.** Random forest variable importance plots of adducts predictive of selected covariates.

**A**

**E**

**D**

**C**

**B**

**Figure S5.** Linear regression of case-control differences in adduct levels on days from recruitment to CRC diagnosis for 47 matched pairs of subjects (associated adducts only).
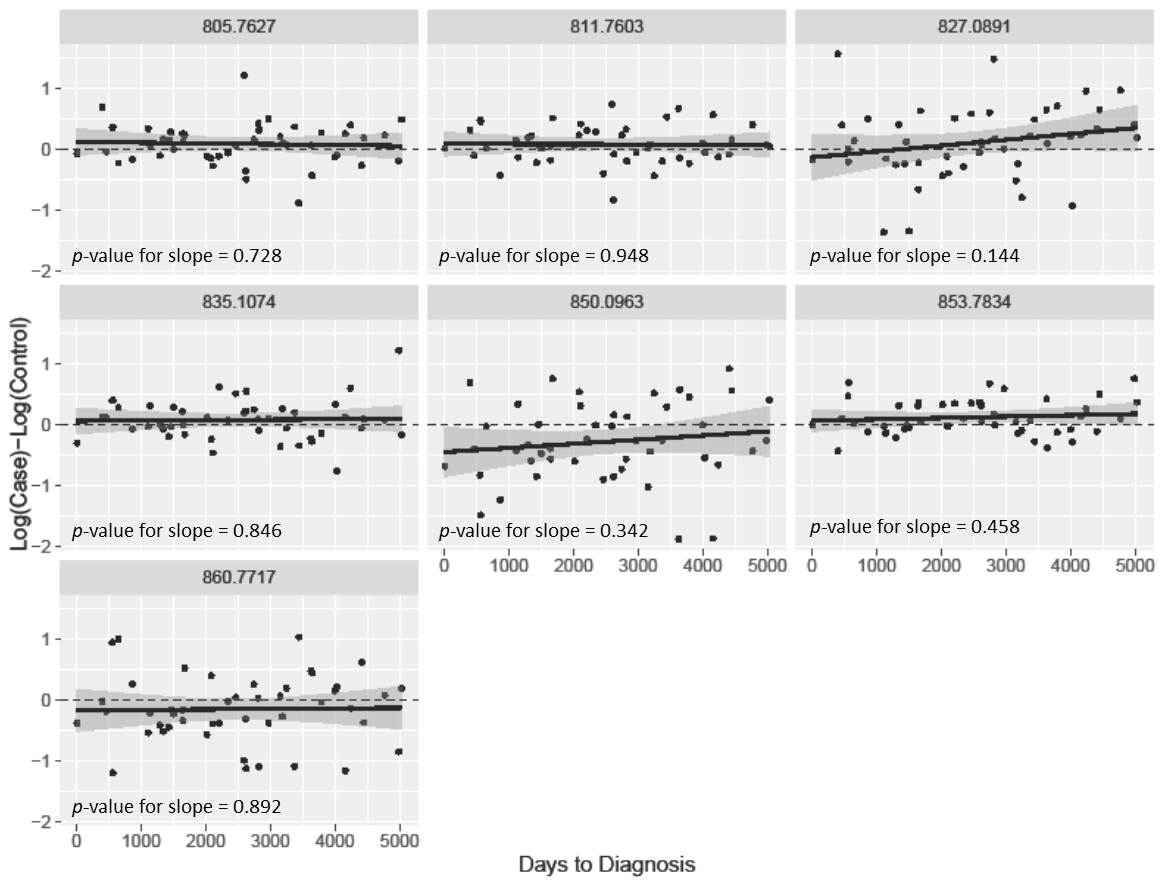

Supplement: 00085472can191529-sup-222385_3_supp_5813776_pyt088.docx [file 00085472can191529-sup-222385_3_supp_5813776_pyt088.docx]
